# Supplementary material for: Genome-wide association study identifies multiple susceptibility loci for multiple myeloma
Source: PubMed Central journal article supplement (PMC4932178; doi:10.1038/ncomms12050), 2016-07-01
Supplement: ncomms12050-s1.pdf [file ncomms12050-s1.pdf]

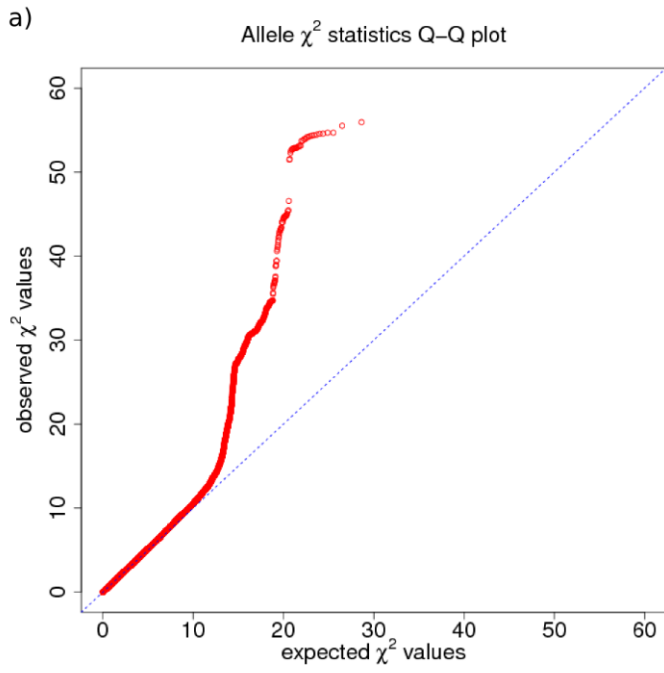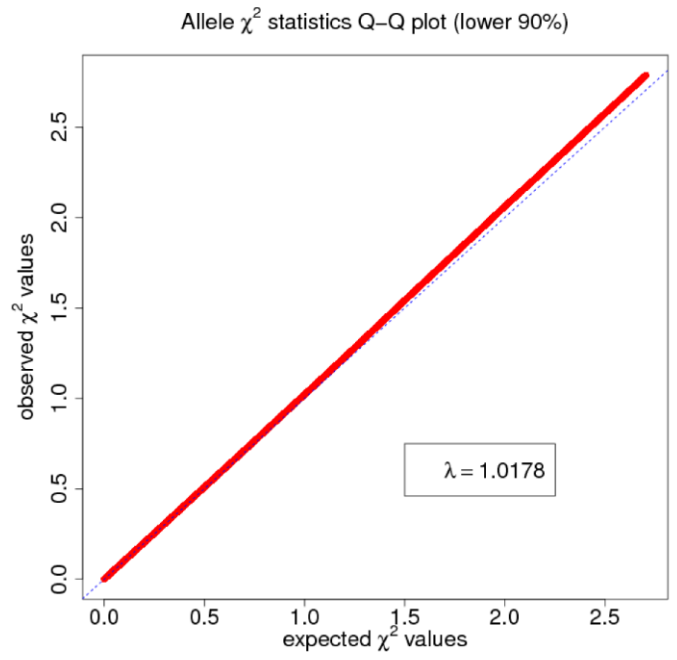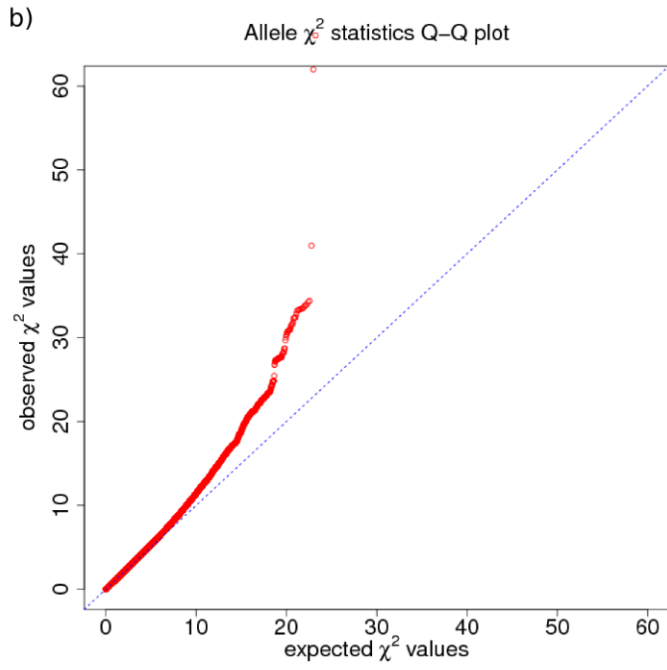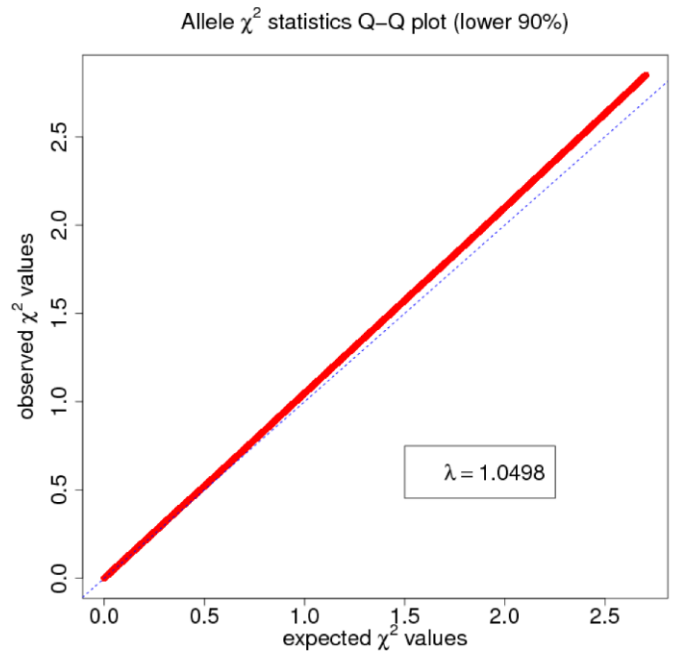

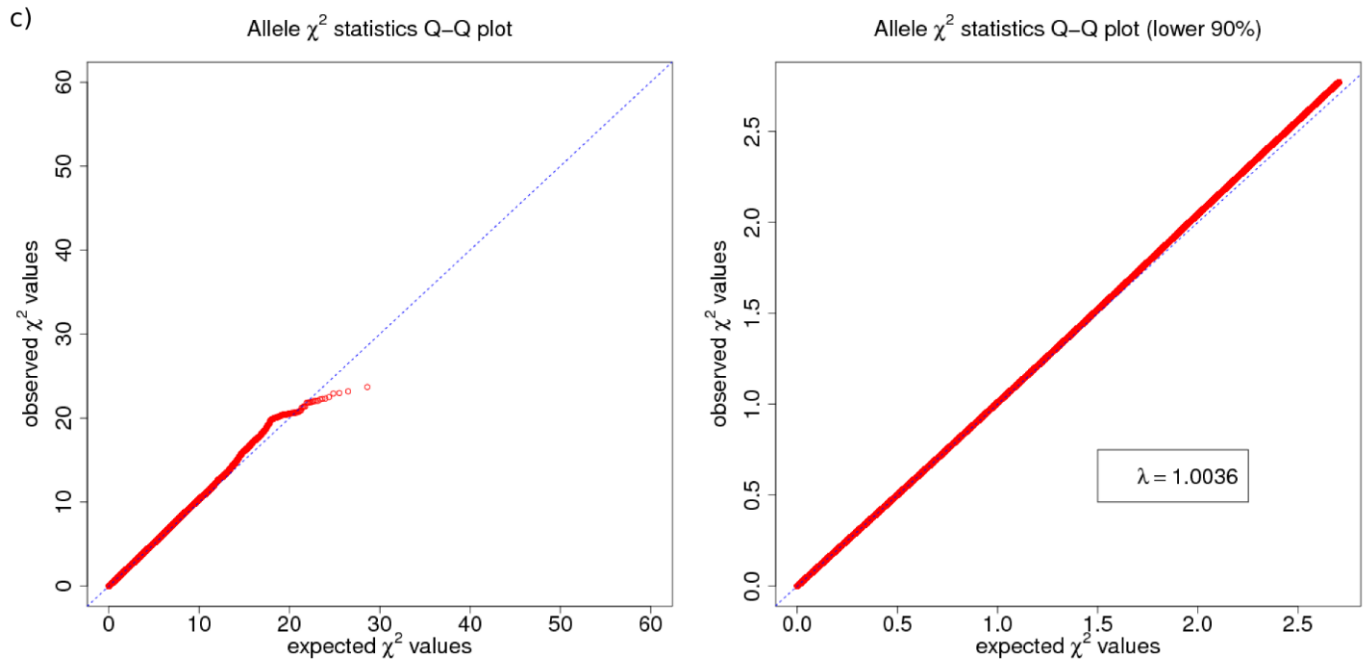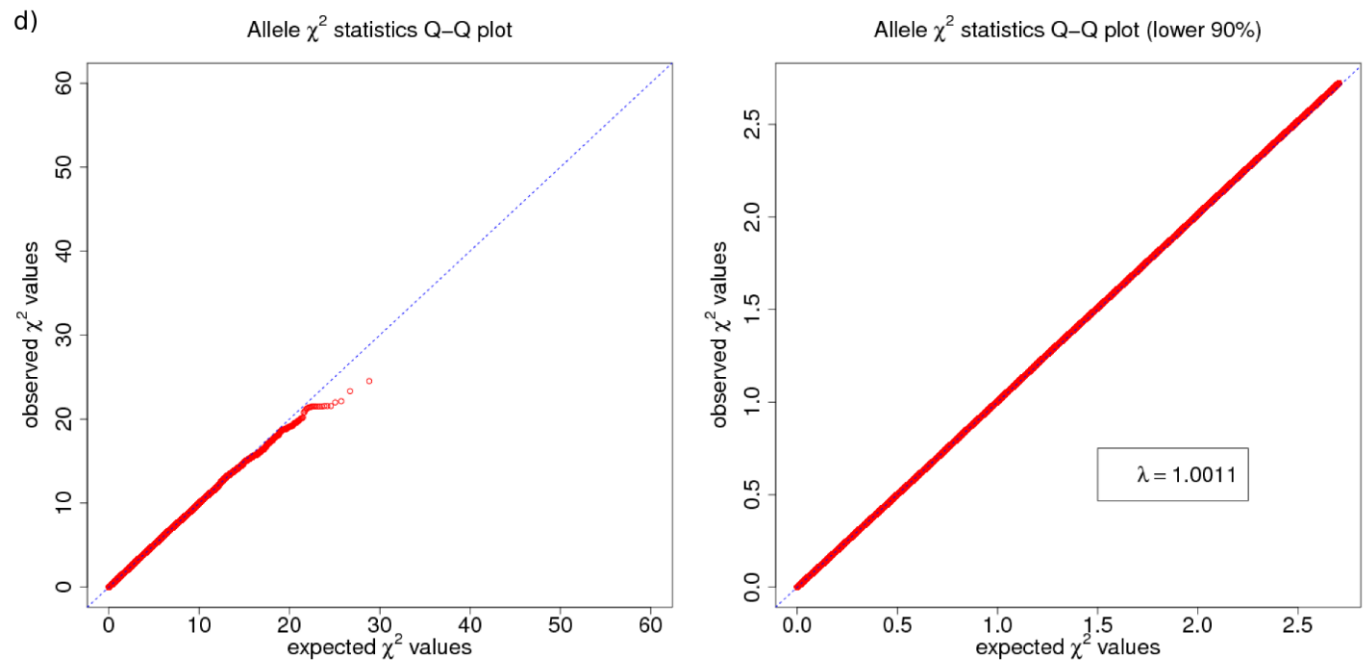

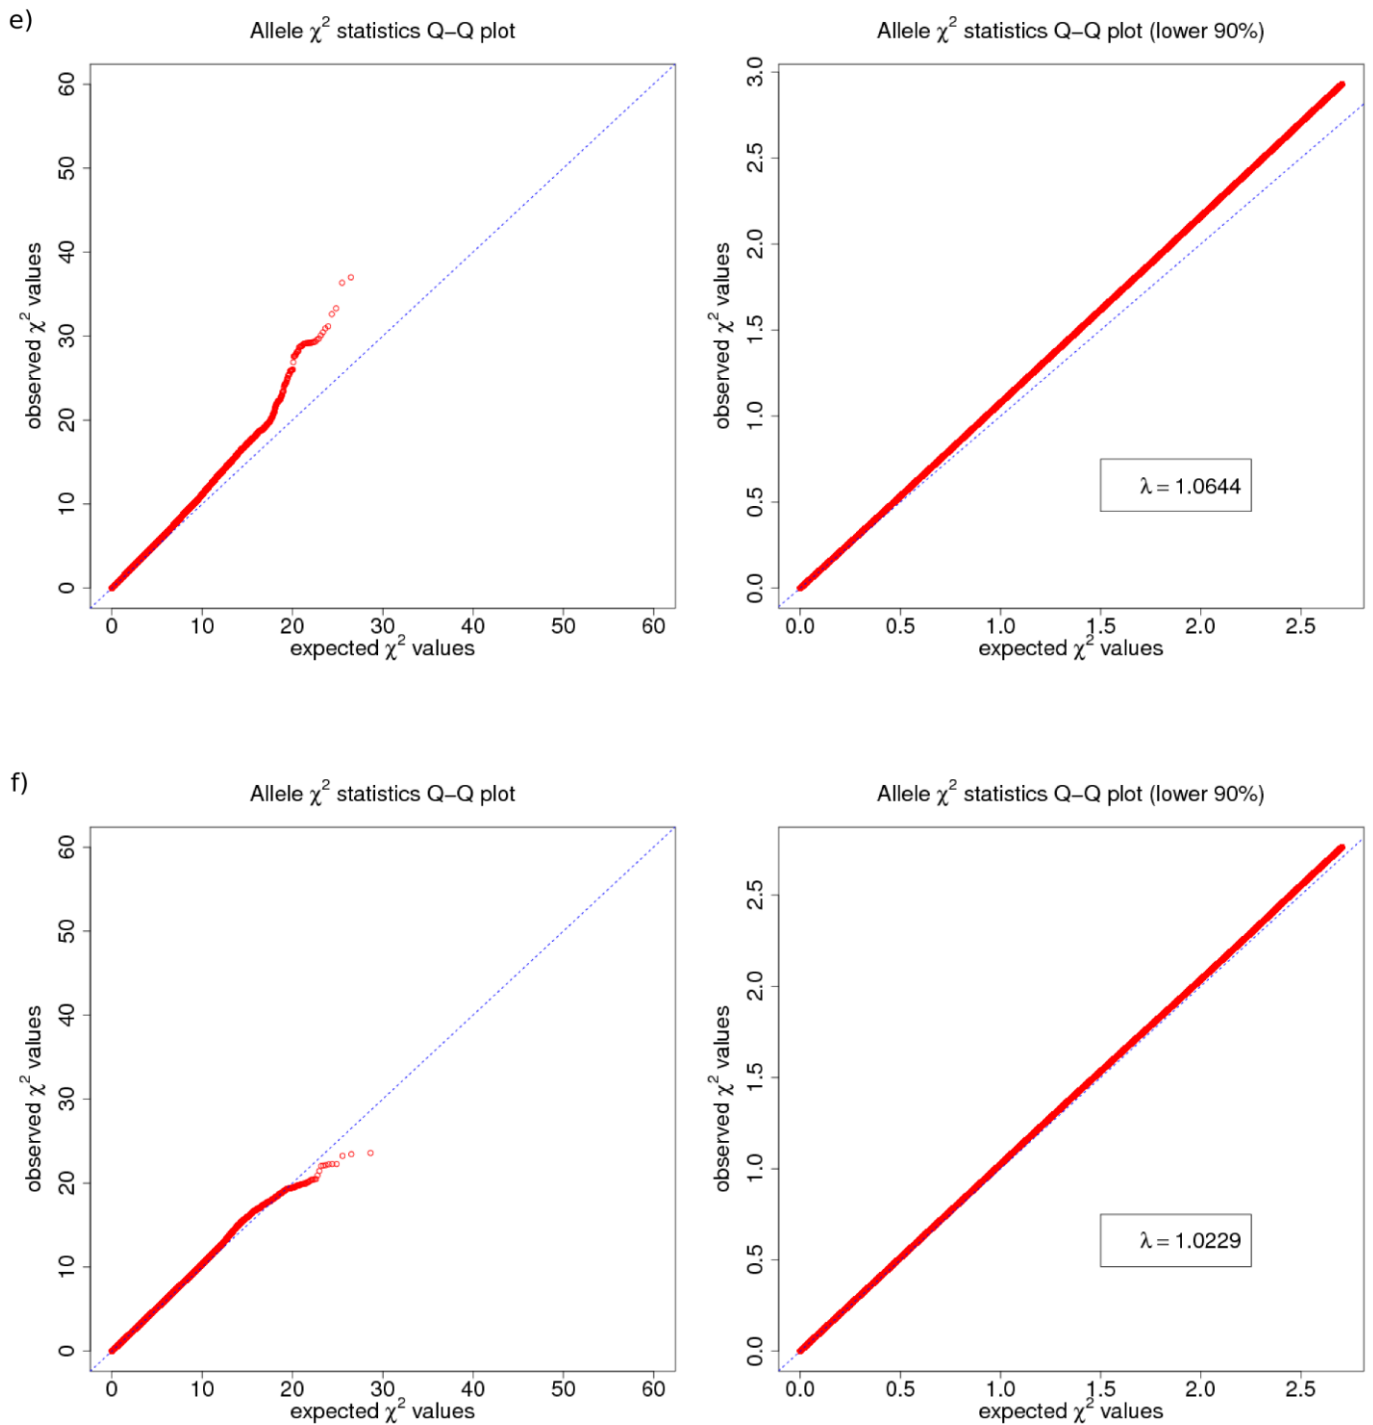

**Supplementary Figure 1: Quantile-Quantile (Q-Q) plots of observed and expected  $\chi^2$  values of association between SNP genotype and risk of multiple myeloma after imputation. a) UK, b) Sweden/Norway, c) Germany, d) Iceland, e) USA and f) Netherlands. The blue line represents the null hypothesis of no true association.**

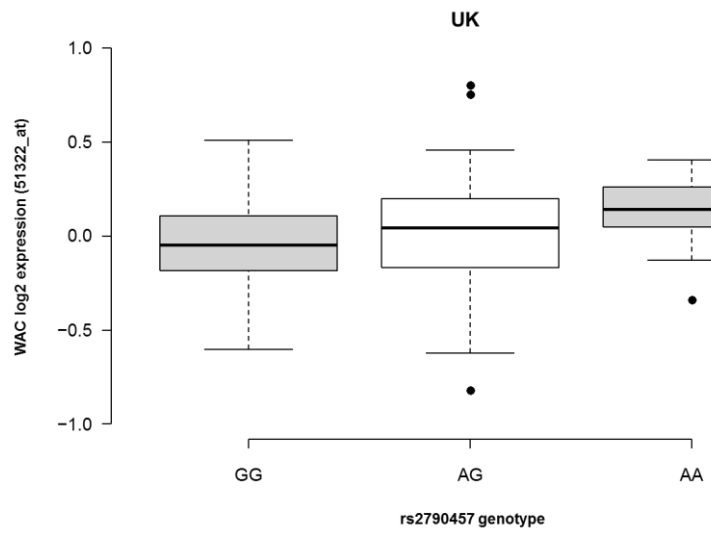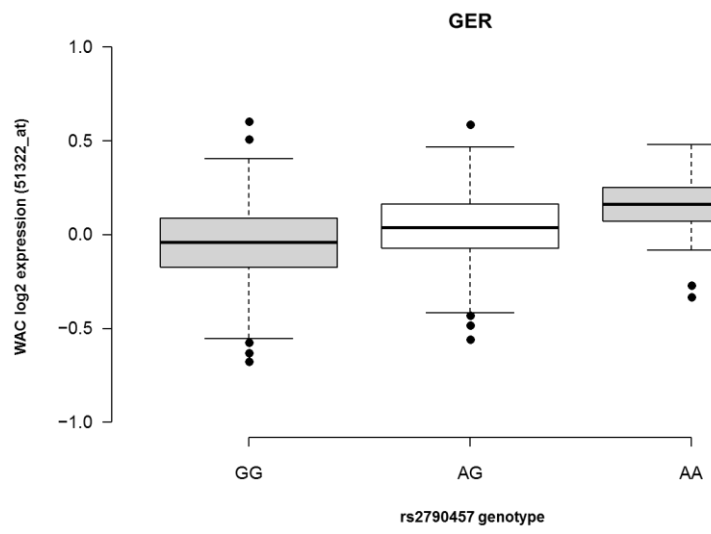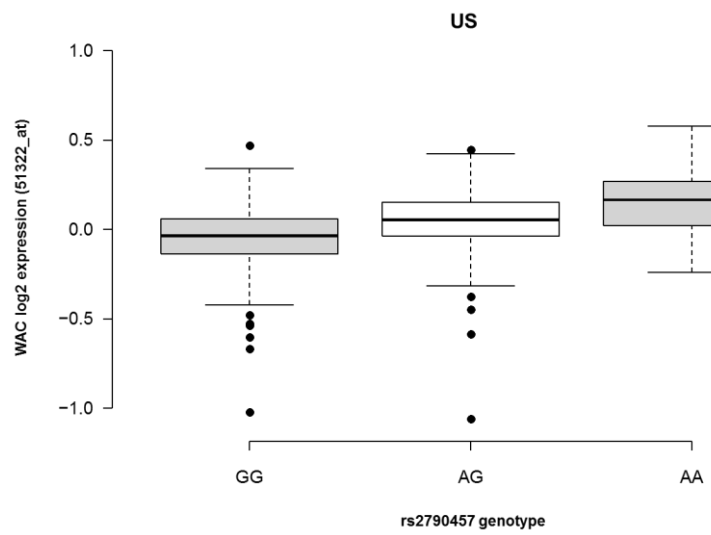

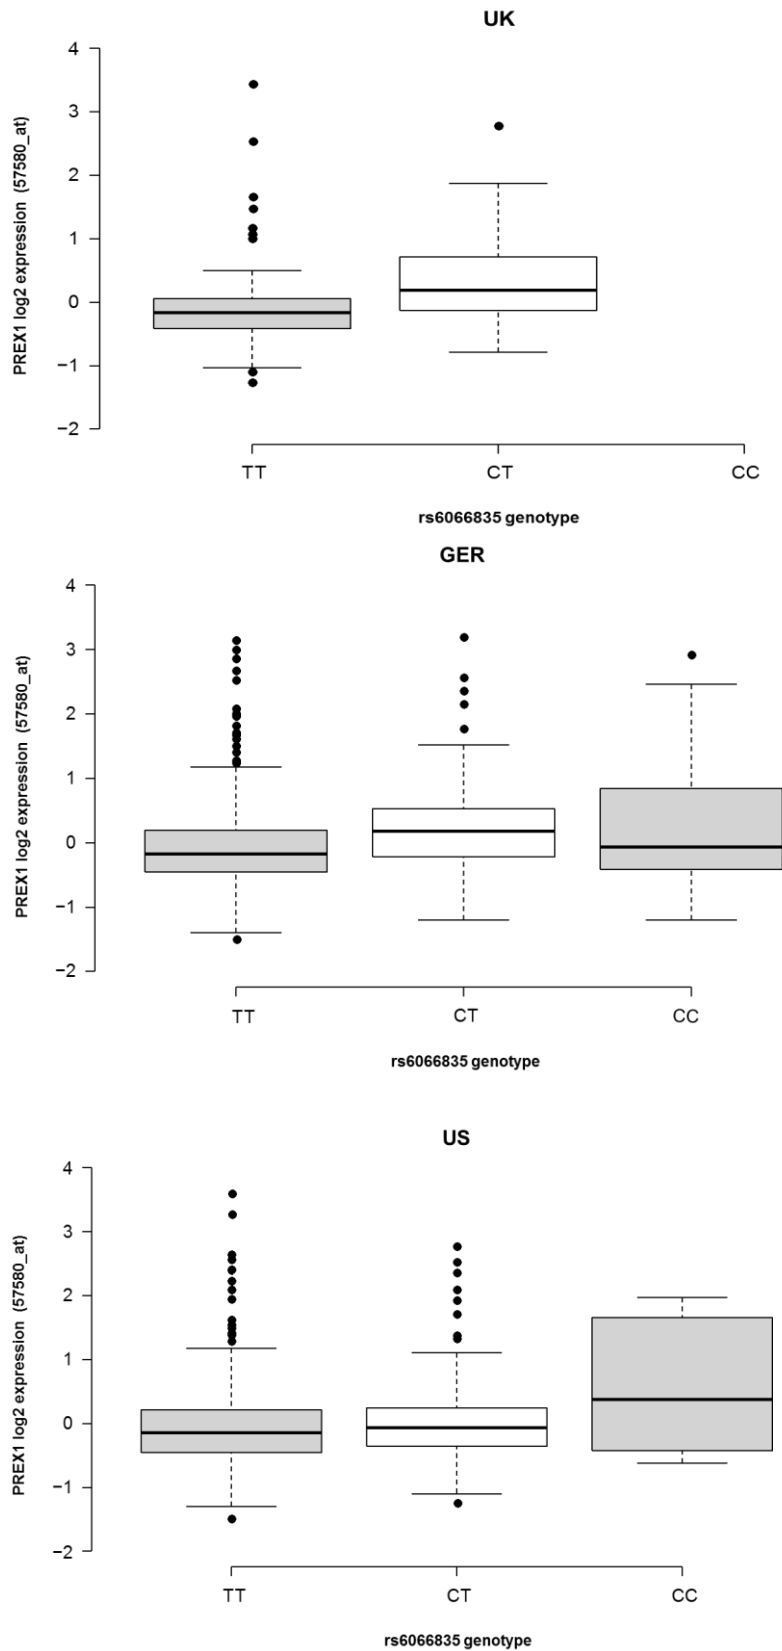

**Supplementary Figure 2: eQTL boxplots.** Relationship between rs2790457 (10p12.1) genotype and *WAC* expression, and rs6066835 (20q13.13) and *PREX1* in CD138+ selected plasma cells from 658 German, 183 UK and 608 US myeloma patients. The central line in each box indicates the median; the bottom and top lines of the box are the 25<sup>th</sup> and 75<sup>th</sup> percentiles; whiskers extend 1.5 times from the 25<sup>th</sup> and 75<sup>th</sup> percentiles.

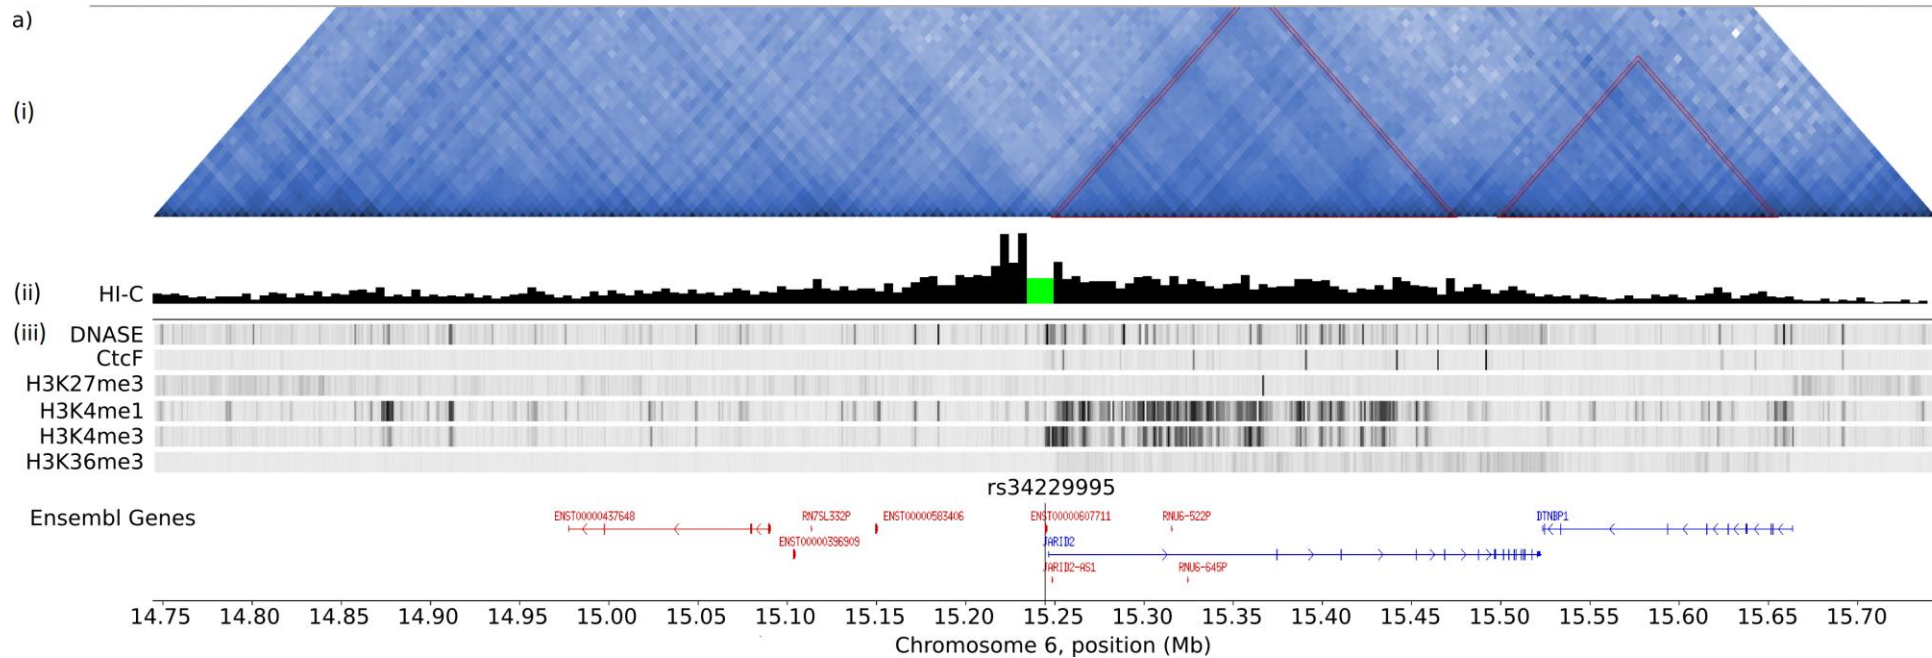

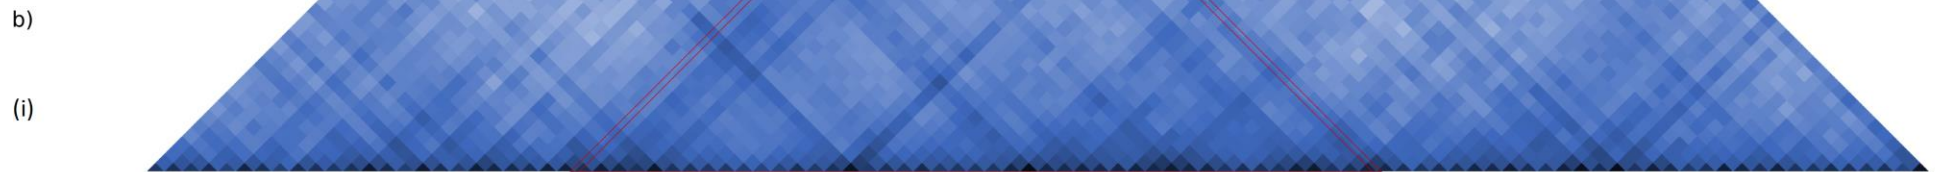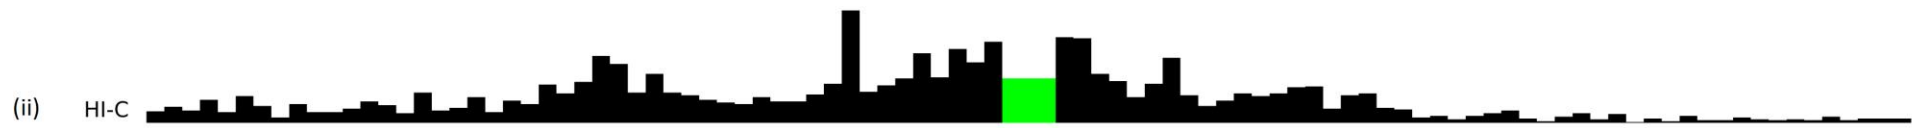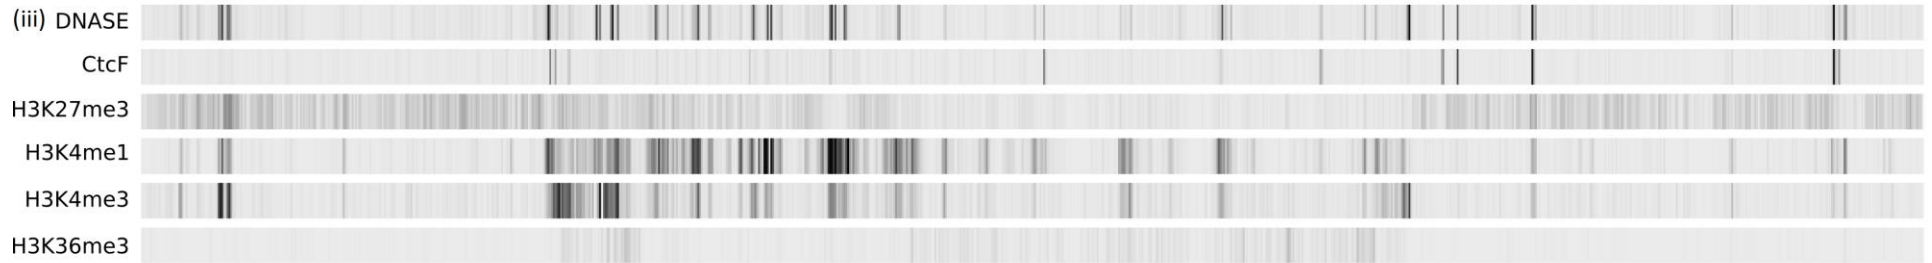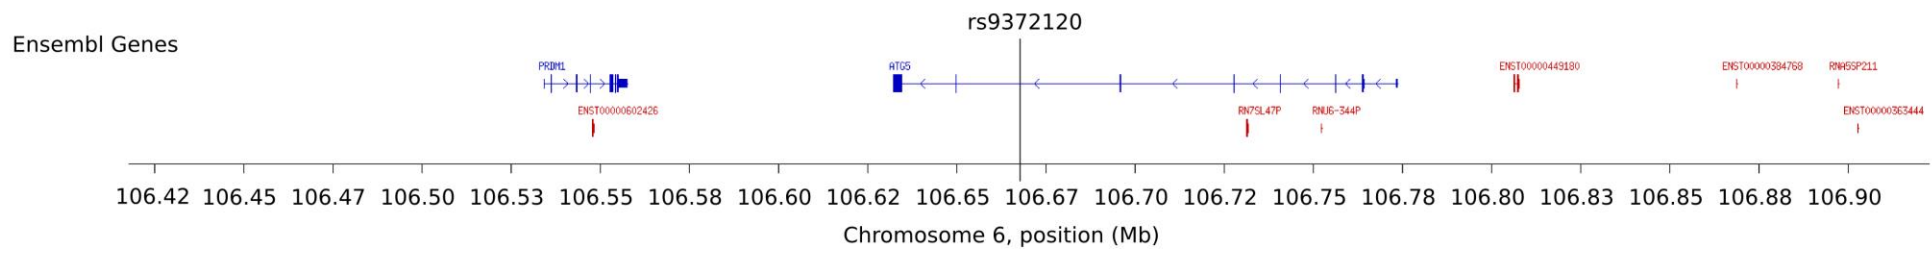

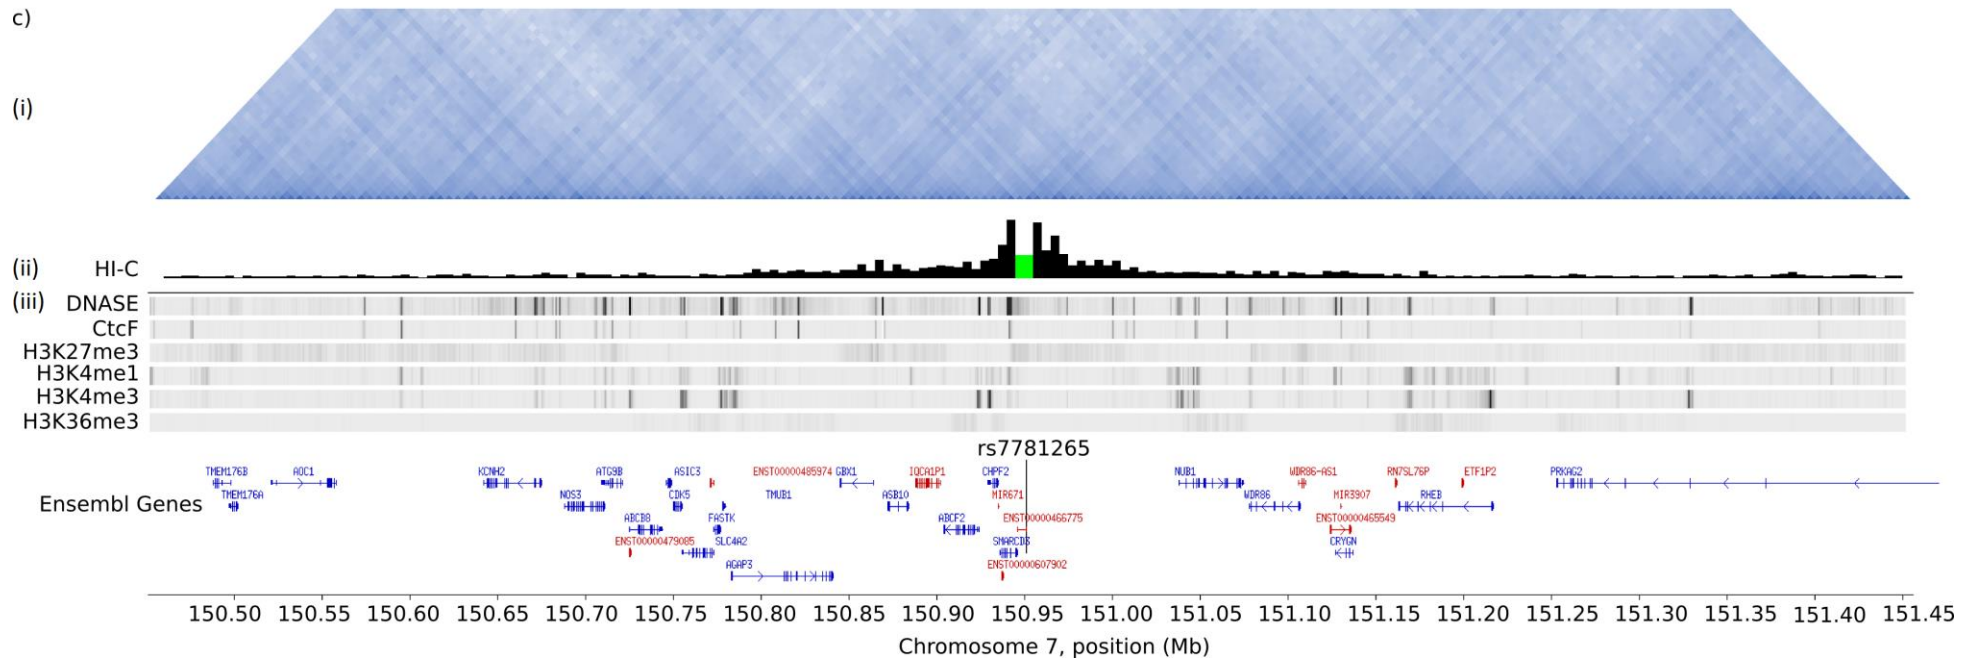



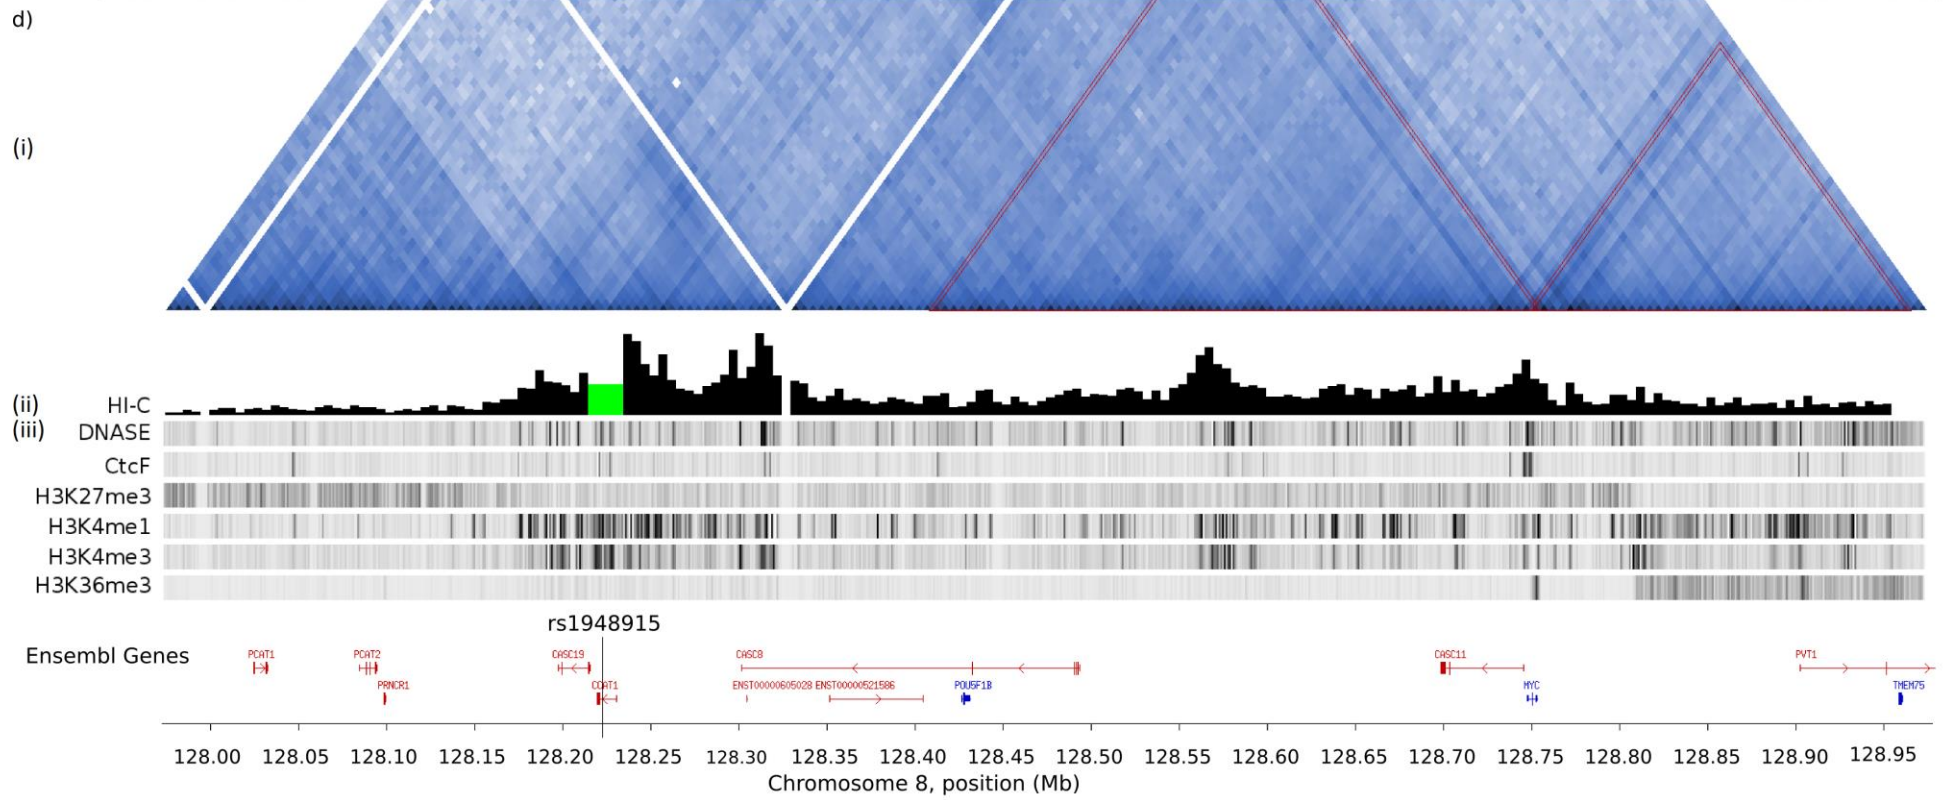

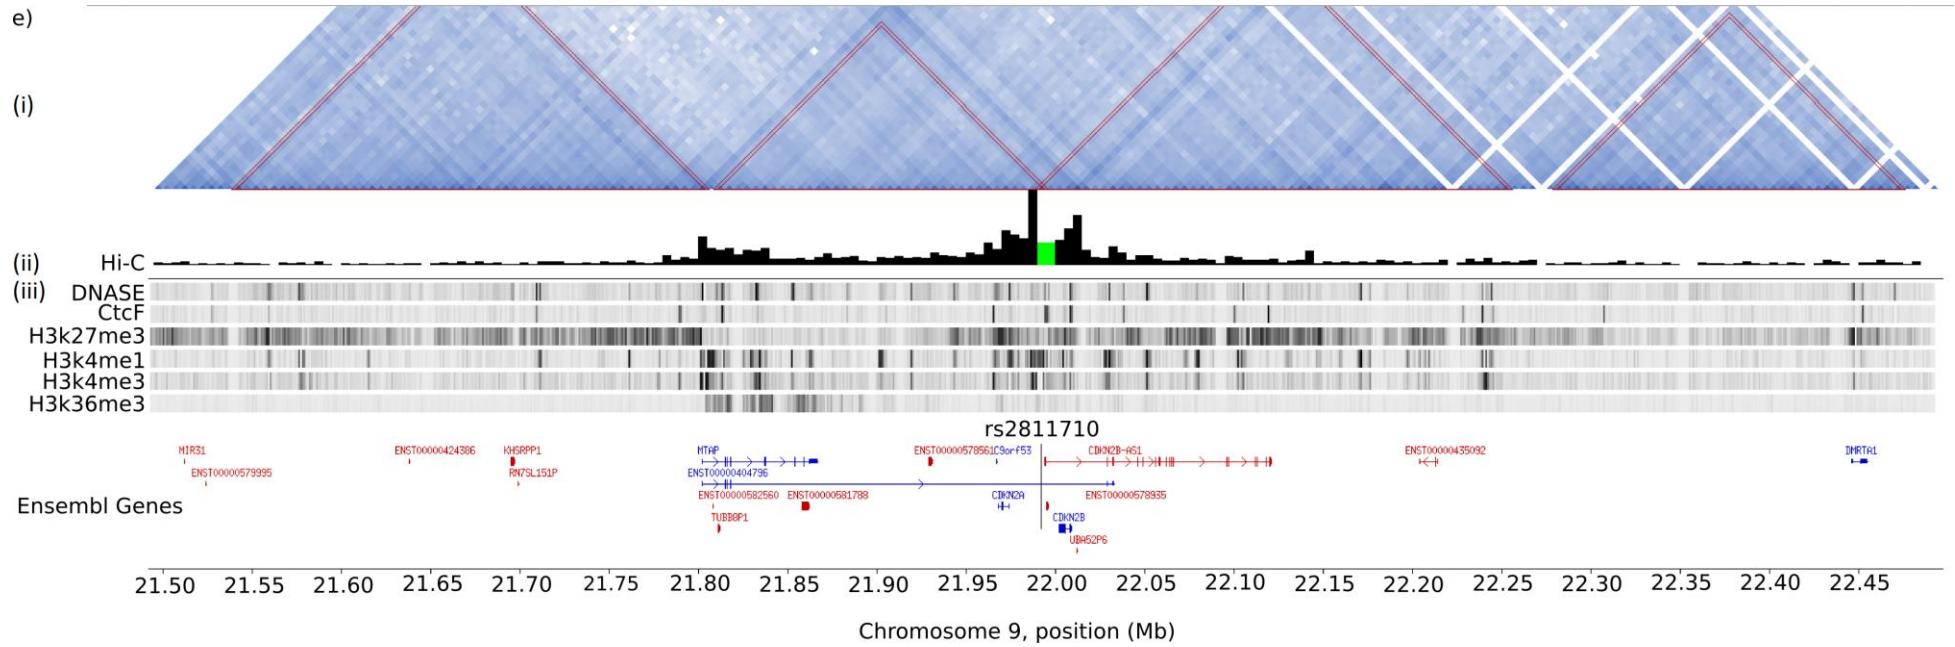

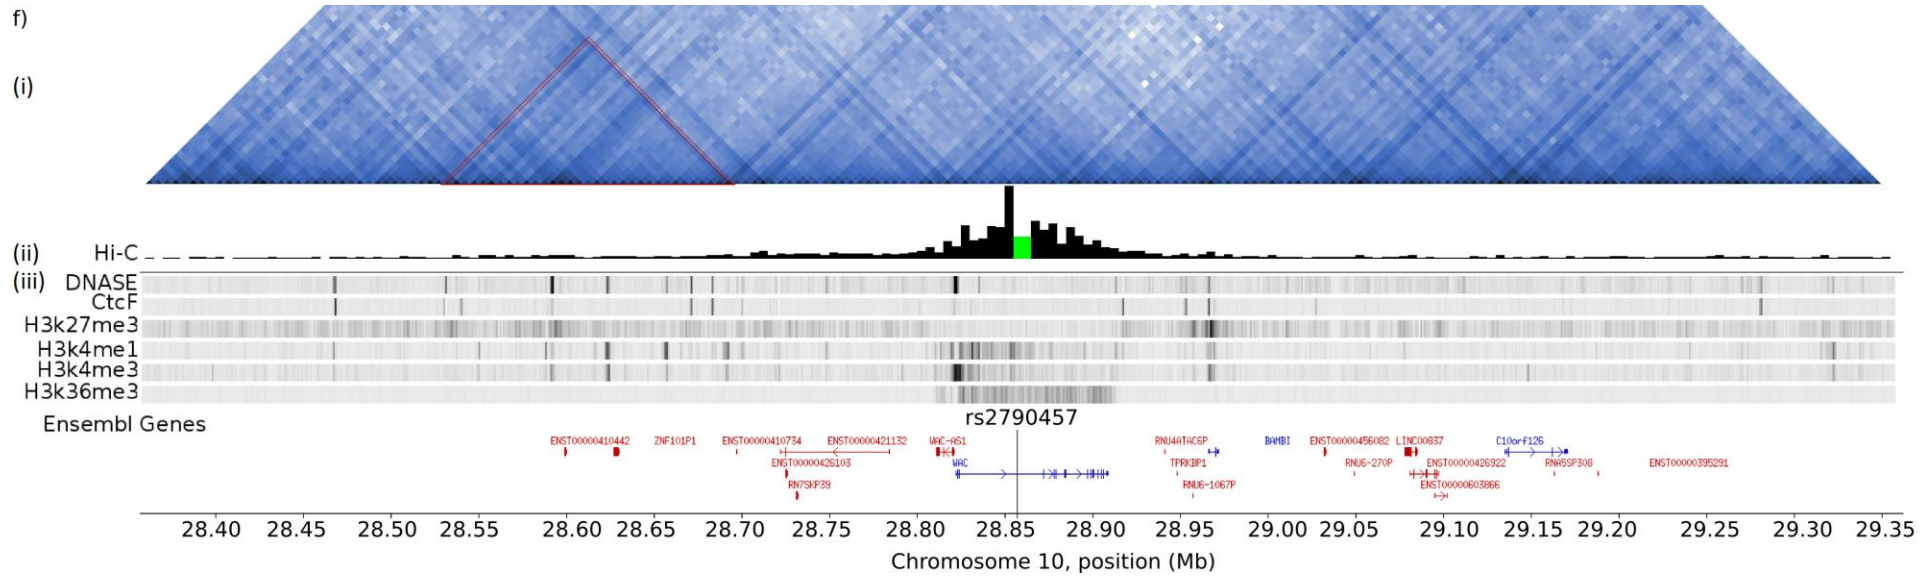

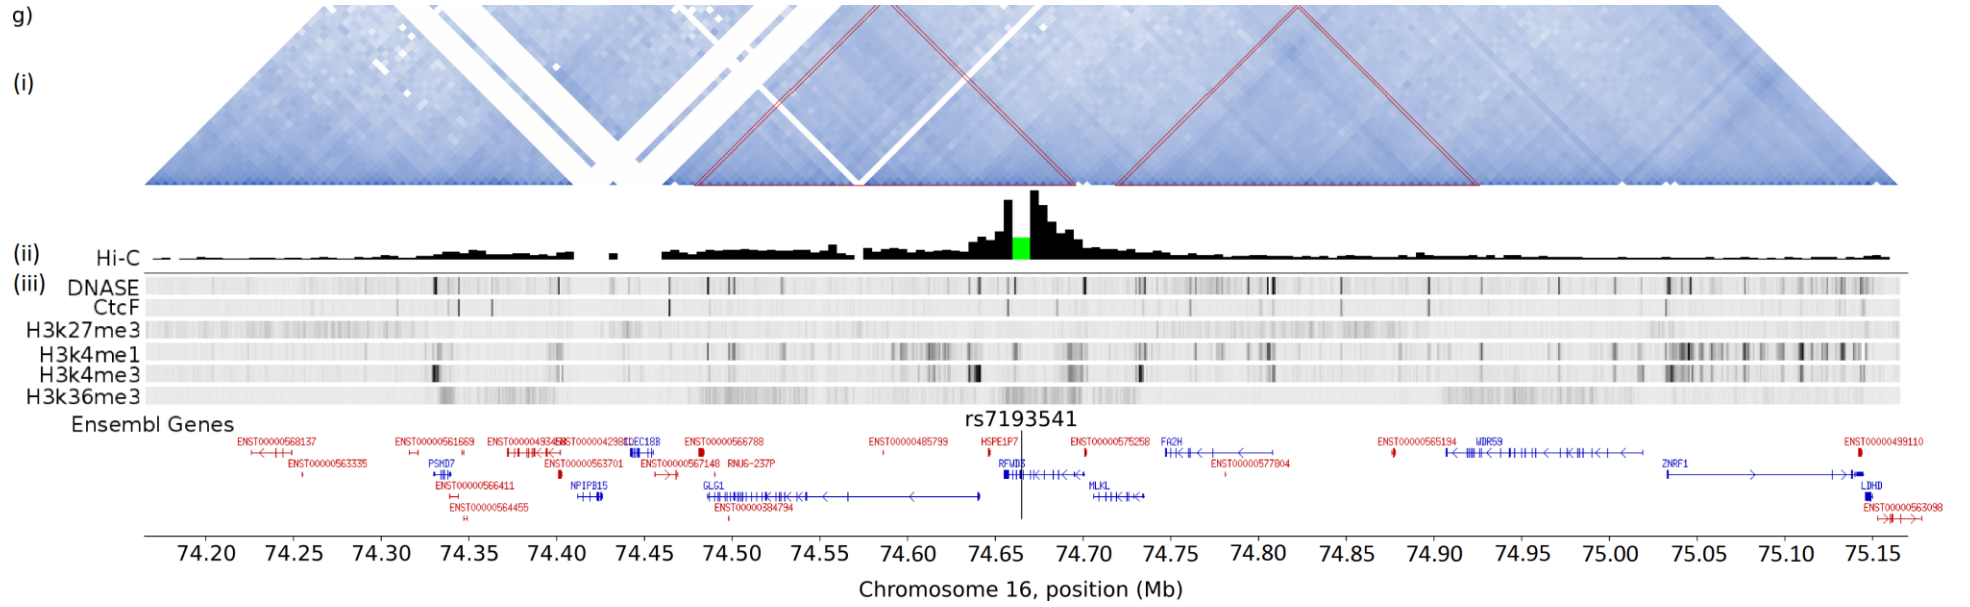

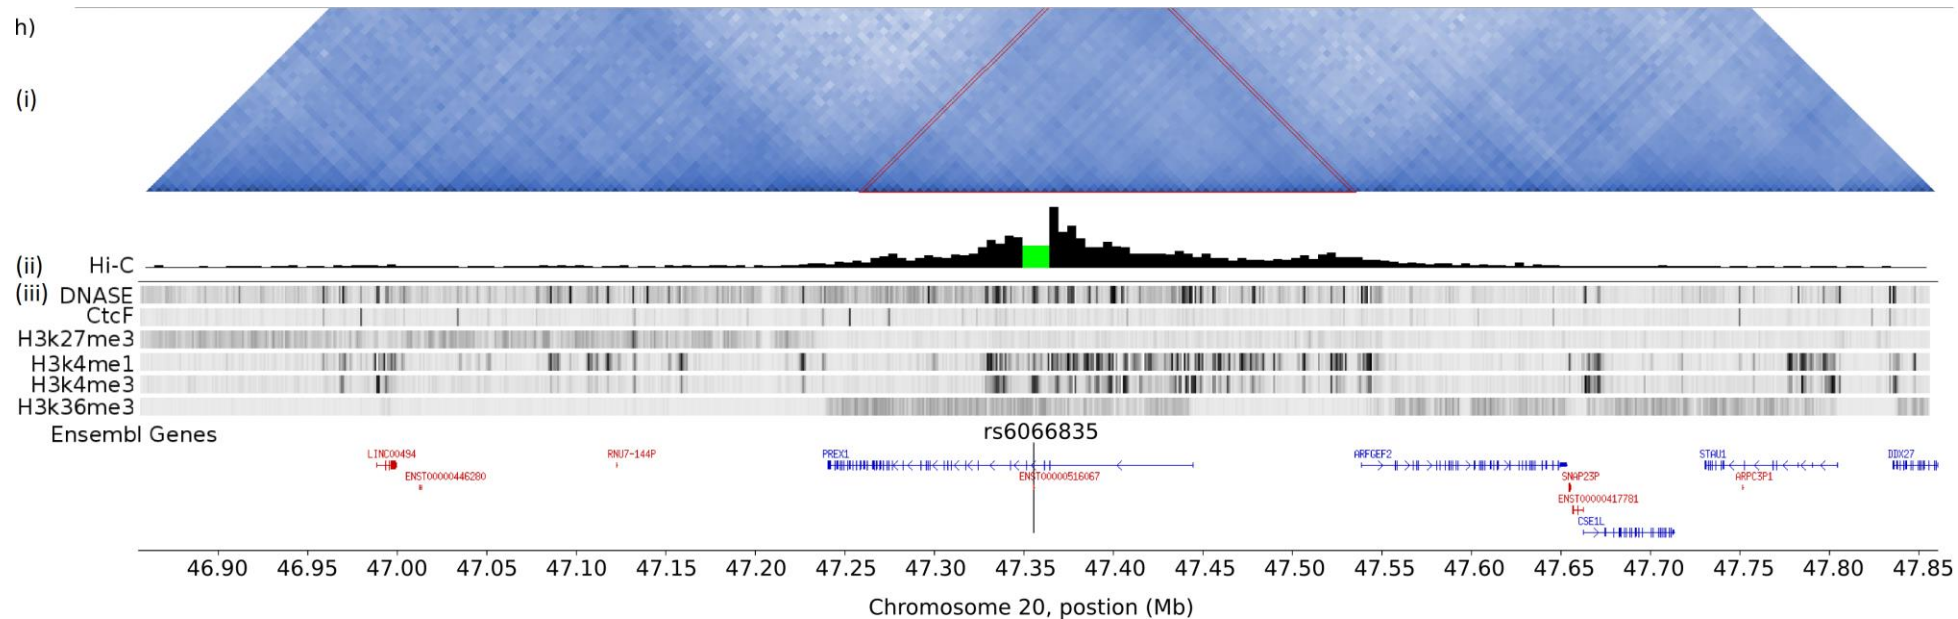

**Supplementary Figure 3: Definition of topological domains (TADs) at risk loci and patterns of local chromatin interactions in GM12878<sup>1</sup>.**

(i) The upper panel shows heat map of chromatin interactions. TADs at each locus (double-red line) were inferred by the Arrowhead method and are superimposed. (ii) Middle panel denotes virtual 4C experiment defined by Hi-C intensity according to viewpoint based on sentinel SNP. The green box denotes a 5Kb (masked) region flanking the sentinel SNP. (iii) Lower panel shows DNase, CTCF, H3K27me3, H3K4me1, H3K4me3 and H3K36me3 tracks for GM12878.

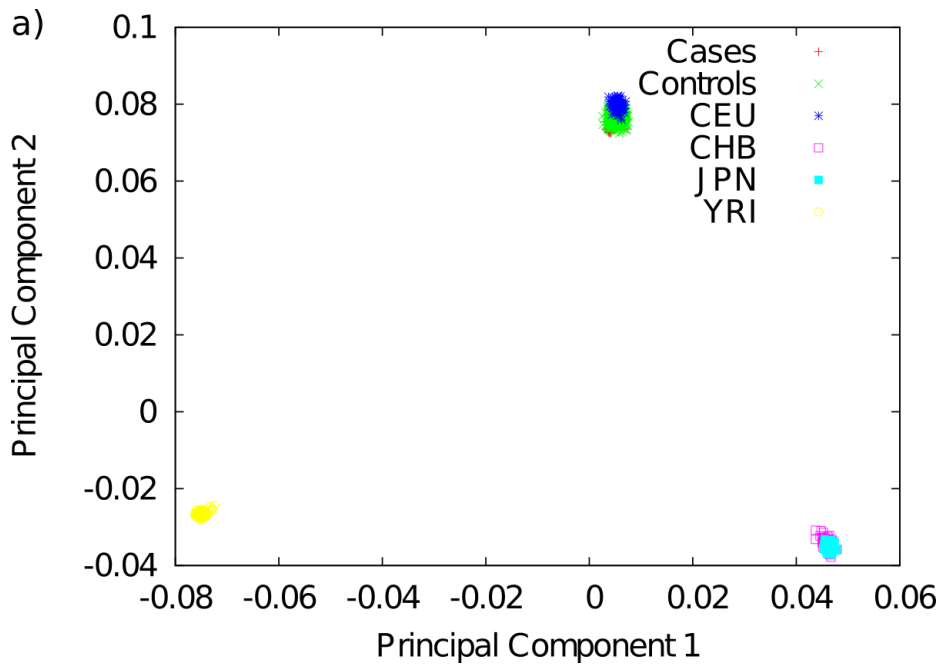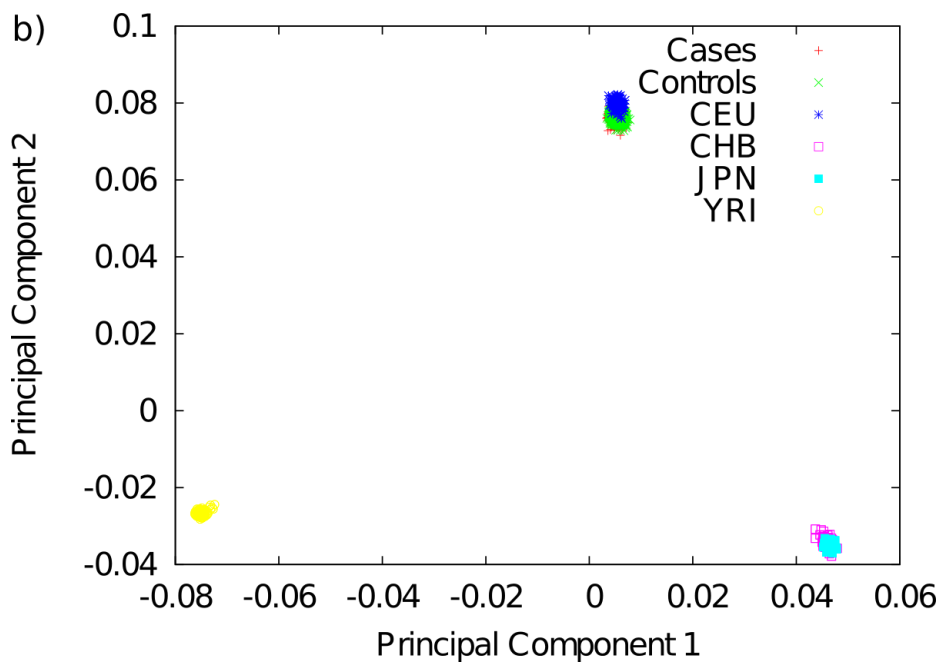



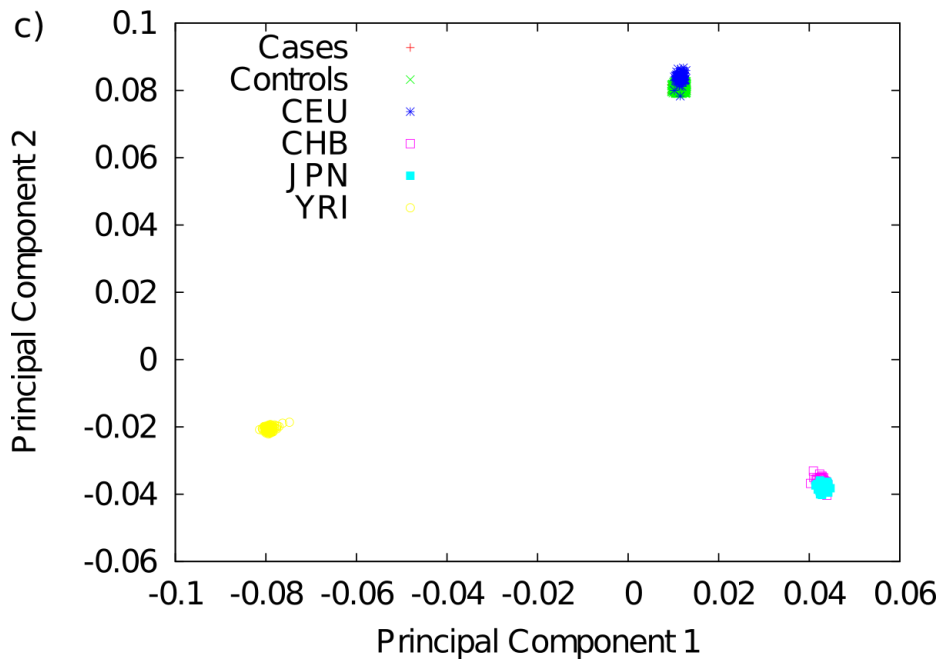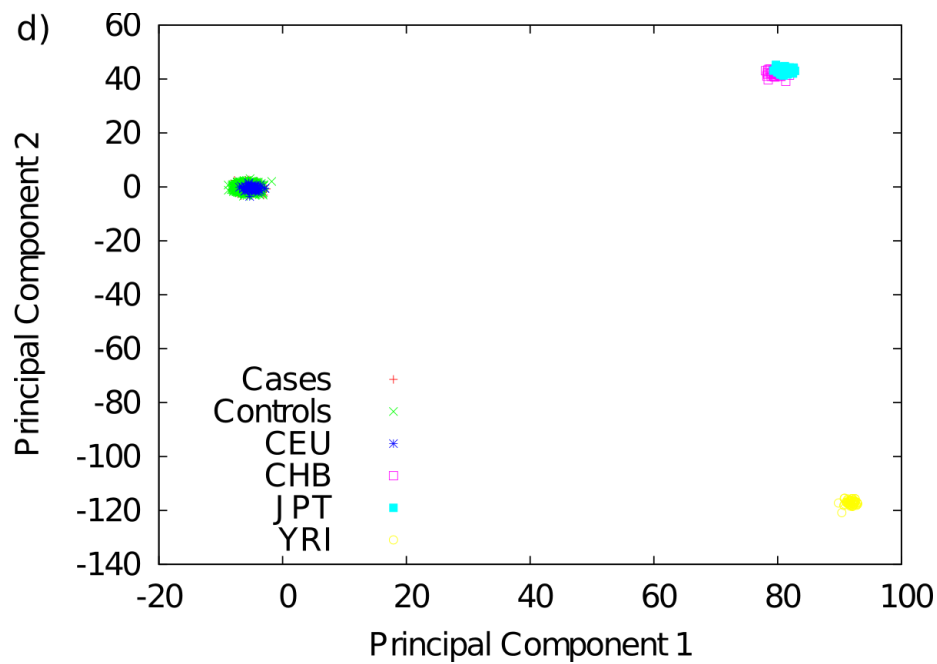

**Supplementary Figure 4: Identification of individuals of non-European ancestry in cases and controls.**

(a) UK-GWAS (Thresholds;  $0.0025 < PC1 < 0.0076$ ,  $0.0724 < PC2 < 0.0804$ ), (b) German-GWAS (Thresholds;  $0.0033 < PC1 < 0.0079$ ,  $0.0716 < PC2 < 0.0803$ ), (c) USA-GWAS (Thresholds;  $0.0096 < PC1 < 0.0129$ ,  $0.0791 < PC2 < 0.0829$ ) and (d) Netherlands-GWAS (Thresholds;  $-8.8 < PC1 < -1.7$ ,  $-3.5 < PC2 < 3.1$ ). The first two principal components of the analysis are plotted. HapMap CEU individuals are plotted in blue; CHB individuals are plotted in indigo; JPN are plotted in cyan; YRI individuals are plotted in yellow. Cases are plotted in red, controls plotted in green, and have been removed if observed here to be of non-European ancestry.

|                       | UK    |          | Sweden/Norway |          | Germany |          | Netherlands |          | USA   |          | Iceland |          |
|-----------------------|-------|----------|---------------|----------|---------|----------|-------------|----------|-------|----------|---------|----------|
|                       | Cases | Controls | Cases         | Controls | Cases   | Controls | Cases       | Controls | Cases | Controls | Cases   | Controls |
| Pre-QC                | 2,329 | 5,199    |               |          | 1,512   | 2,107    | 608         | 2669     | 1,076 | 2,234    |         |          |
| Sex discrepancy       | 10    | 0        |               |          | 1       | 0        | 0           | 0        | 0     | 0        |         |          |
| Call rate fail        | 1     | 0        |               |          | 0       | 0        | 2           | 0        | 0     | 4        |         |          |
| Heterozygosity rate   | NA    | NA       |               |          | NA      | NA       | 7           | 0        | 9     | 2        |         |          |
| Related Individuals   | 2     | 2        |               |          | 0       | 0        | 0           | 0        | 1     | 0        |         |          |
| Non-European Ancestry | 34    | 0        |               |          | 3       | 0        | 44          | 0        | 286   | 369      |         |          |
| Post-QC               | 2,282 | 5,197    | 1,714         | 10,391   | 1,508   | 2,107    | 555         | 2669     | 780   | 1,857    | 480     | 212,164  |

**Supplementary Table 1: Details of the quality control filters applied to each GWAS.** Samples were excluded due to call rate (<95% or failed genotyping), ethnicity (principle components analysis or other samples reported to be not of white, European descent), relatedness (any individuals found to be duplicated or related within or between data sets through IBS) or sex discrepancy. Sweden/Norway and Iceland: These studies have been previously reported in their entirety with full QC details<sup>2</sup>.

|                    | UK        | Sweden/Norway | Germany   | Netherlands | USA       | Iceland    |
|--------------------|-----------|---------------|-----------|-------------|-----------|------------|
| Pre-QC             | 409,429   |               | 401,405   | 646,124     | 296,998   |            |
| Call rate fail     | 997       |               | 113       | 6,523       | 4         |            |
| HWE fail           | 7         |               | 0         | 18,104      | 171       |            |
| MAF < 0.01         | 3         |               | 1         | 0           | 9151      |            |
| Post-QC            | 408,422   |               | 401,291   | 621,497     | 287,672   |            |
| Imputed (filtered) | 8,517,071 | 7,182,761     | 8,282,831 | 8,628,799   | 8,085,846 | 10,291,845 |

**Supplementary Table 2: Details of the quality control filters applied to each GWAS.** Genotyped SNPs with a call rate <95% were excluded as were those with a MAF<0.01 or displaying significant deviation from Hardy-Weinberg equilibrium (*i.e.*  $P < 10^{-5}$ ). Imputed SNPs with information score <0.8 and MAF <0.005 were excluded. Sweden/Norway and Iceland: These studies have been previously reported in their entirety with full QC details<sup>2</sup>.



| Locus   | Published SNP | Strongest signal (current GWAS) | Position (hg19, bp) | Risk Allele | Literature OR (95% CI)            | Literature <i>P</i> value             | Current GWAS OR (95% CI)             | Current GWAS <i>P</i> value                      | Reference |         |            |           |          |   |                                   |                                       |                                      |                                                  |   |            |            |   |           |            |                               |                                    |                                      |                                                  |                                       |                                      |                                                  |   |            |            |   |           |            |                                  |                                       |                                      |                                                  |                                       |                                      |                                                  |   |           |           |   |          |            |                                   |                                       |                                      |                                                  |                                       |                                      |                                                 |   |           |           |   |          |          |                                   |                                       |                                      |                                                  |                                      |                                      |                                                |   |          |            |   |          |   |                                   |                                       |                                      |                                                  |   |           |          |   |       |            |  |          |   |                                   |                                       |                                      |                                                 |   |           |          |   |       |          |  |          |   |                                   |
|---------|---------------|---------------------------------|---------------------|-------------|-----------------------------------|---------------------------------------|--------------------------------------|--------------------------------------------------|-----------|---------|------------|-----------|----------|---|-----------------------------------|---------------------------------------|--------------------------------------|--------------------------------------------------|---|------------|------------|---|-----------|------------|-------------------------------|------------------------------------|--------------------------------------|--------------------------------------------------|---------------------------------------|--------------------------------------|--------------------------------------------------|---|------------|------------|---|-----------|------------|----------------------------------|---------------------------------------|--------------------------------------|--------------------------------------------------|---------------------------------------|--------------------------------------|--------------------------------------------------|---|-----------|-----------|---|----------|------------|-----------------------------------|---------------------------------------|--------------------------------------|--------------------------------------------------|---------------------------------------|--------------------------------------|-------------------------------------------------|---|-----------|-----------|---|----------|----------|-----------------------------------|---------------------------------------|--------------------------------------|--------------------------------------------------|--------------------------------------|--------------------------------------|------------------------------------------------|---|----------|------------|---|----------|---|-----------------------------------|---------------------------------------|--------------------------------------|--------------------------------------------------|---|-----------|----------|---|-------|------------|--|----------|---|-----------------------------------|---------------------------------------|--------------------------------------|-------------------------------------------------|---|-----------|----------|---|-------|----------|--|----------|---|-----------------------------------|
| 2p23.3  | rs6746082     |                                 | 25659244            | A           | 1.29 (1.17-1.42)<br>$r^2 = 0.483$ | $1.22 \times 10^{-7}$<br>$D' = 0.713$ | 1.20 (1.15-1.26)<br>1.24 (1.18-1.30) | $2.28 \times 10^{-14}$<br>$1.24 \times 10^{-16}$ | 3         |         |            |           |          |   |                                   |                                       |                                      |                                                  |   |            |            |   |           |            |                               |                                    |                                      |                                                  |                                       |                                      |                                                  |   |            |            |   |           |            |                                  |                                       |                                      |                                                  |                                       |                                      |                                                  |   |           |           |   |          |            |                                   |                                       |                                      |                                                  |                                       |                                      |                                                 |   |           |           |   |          |          |                                   |                                       |                                      |                                                  |                                      |                                      |                                                |   |          |            |   |          |   |                                   |                                       |                                      |                                                  |   |           |          |   |       |            |  |          |   |                                   |                                       |                                      |                                                 |   |           |          |   |       |          |  |          |   |                                   |
|         |               | rs7577599                       | 25613146            | T           |                                   |                                       |                                      |                                                  |           | 3p22.1  | rs1052501  |           | 41925398 | C | 1.32 (1.20-1.45)<br>$r^2 = 0.309$ | $7.47 \times 10^{-9}$<br>$D' = 0.643$ | 1.25 (1.18-1.31)<br>1.26 (1.20-1.33) | $8.19 \times 10^{-17}$<br>$8.75 \times 10^{-18}$ | 3 | rs6599192  | 41992408   | G | 7p15.3    | rs4487645  | rs4487645                     | 21938240                           | C                                    | 1.38 (1.28-1.50)                                 | $3.33 \times 10^{-15}$                | 1.24 (1.19-1.30)                     | $5.30 \times 10^{-25}$                           | 3 | 3q26.2     | rs10936599 |   | 169492101 | C          | 1.26 (1.18-1.33)<br>$r^2 = 1$    | $8.70 \times 10^{-14}$<br>$D' = 1$    | 1.20 (1.14-1.25)<br>1.20 (1.15-1.26) | $9.35 \times 10^{-15}$<br>$5.94 \times 10^{-15}$ | 4                                     | rs10936600                           | 169514585                                        | A | 6p21.3    | rs2285803 |   | 31107258 | T          | 1.19 (1.13-1.26)<br>$r^2 = 0.94$  | $9.67 \times 10^{-11}$<br>$D' = 0.98$ | 1.19 (1.14-1.24)<br>1.20 (1.15-1.25) | $1.04 \times 10^{-16}$<br>$2.97 \times 10^{-17}$ | 4                                     | rs3132535                            | 31116526                                        | A | 17p11.2   | rs4273077 |   | 16849139 | G        | 1.26 (1.16-1.36)<br>$r^2 = 0.904$ | $7.67 \times 10^{-9}$<br>$D' = 0.958$ | 1.29 (1.21-1.37)<br>1.30 (1.23-1.39) | $7.35 \times 10^{-15}$<br>$3.63 \times 10^{-17}$ | 4                                    | rs34562254                           | 16842991                                       | A | 22q13.1  | rs877529   |   | 39542292 | A | 1.23 (1.17-1.29)<br>$r^2 = 1$     | $7.63 \times 10^{-16}$<br>$D' = 1$    | 1.23 (1.19-1.28)<br>1.23 (1.19-1.28) | $6.07 \times 10^{-26}$<br>$4.98 \times 10^{-26}$ | 4 | rs139402  | 39546145 | C | 5q15  | rs56219066 |  | 95242931 | T | 1.25 (1.16-1.34)<br>$r^2 = 0.962$ | $9.6 \times 10^{-10}$<br>$D' = 0.981$ | 1.16 (1.10-1.22)<br>1.17 (1.12-1.22) | $8.06 \times 10^{-8}$<br>$1.57 \times 10^{-11}$ | 5 | rs1423269 | 95255724 | A | 22q13 | rs138740 |  | 35699582 | C | 1.18 (1.11-1.25)<br>$r^2 = 0.955$ |
| 3p22.1  | rs1052501     |                                 | 41925398            | C           | 1.32 (1.20-1.45)<br>$r^2 = 0.309$ | $7.47 \times 10^{-9}$<br>$D' = 0.643$ | 1.25 (1.18-1.31)<br>1.26 (1.20-1.33) | $8.19 \times 10^{-17}$<br>$8.75 \times 10^{-18}$ | 3         |         |            |           |          |   |                                   |                                       |                                      |                                                  |   |            |            |   |           |            |                               |                                    |                                      |                                                  |                                       |                                      |                                                  |   |            |            |   |           |            |                                  |                                       |                                      |                                                  |                                       |                                      |                                                  |   |           |           |   |          |            |                                   |                                       |                                      |                                                  |                                       |                                      |                                                 |   |           |           |   |          |          |                                   |                                       |                                      |                                                  |                                      |                                      |                                                |   |          |            |   |          |   |                                   |                                       |                                      |                                                  |   |           |          |   |       |            |  |          |   |                                   |                                       |                                      |                                                 |   |           |          |   |       |          |  |          |   |                                   |
|         |               | rs6599192                       | 41992408            | G           |                                   |                                       |                                      |                                                  |           | 7p15.3  | rs4487645  | rs4487645 | 21938240 | C | 1.38 (1.28-1.50)                  | $3.33 \times 10^{-15}$                | 1.24 (1.19-1.30)                     | $5.30 \times 10^{-25}$                           | 3 | 3q26.2     | rs10936599 |   | 169492101 | C          | 1.26 (1.18-1.33)<br>$r^2 = 1$ | $8.70 \times 10^{-14}$<br>$D' = 1$ | 1.20 (1.14-1.25)<br>1.20 (1.15-1.26) | $9.35 \times 10^{-15}$<br>$5.94 \times 10^{-15}$ | 4                                     | rs10936600                           | 169514585                                        | A | 6p21.3     | rs2285803  |   | 31107258  | T          | 1.19 (1.13-1.26)<br>$r^2 = 0.94$ | $9.67 \times 10^{-11}$<br>$D' = 0.98$ | 1.19 (1.14-1.24)<br>1.20 (1.15-1.25) | $1.04 \times 10^{-16}$<br>$2.97 \times 10^{-17}$ | 4                                     | rs3132535                            | 31116526                                         | A | 17p11.2   | rs4273077 |   | 16849139 | G          | 1.26 (1.16-1.36)<br>$r^2 = 0.904$ | $7.67 \times 10^{-9}$<br>$D' = 0.958$ | 1.29 (1.21-1.37)<br>1.30 (1.23-1.39) | $7.35 \times 10^{-15}$<br>$3.63 \times 10^{-17}$ | 4                                     | rs34562254                           | 16842991                                        | A | 22q13.1   | rs877529  |   | 39542292 | A        | 1.23 (1.17-1.29)<br>$r^2 = 1$     | $7.63 \times 10^{-16}$<br>$D' = 1$    | 1.23 (1.19-1.28)<br>1.23 (1.19-1.28) | $6.07 \times 10^{-26}$<br>$4.98 \times 10^{-26}$ | 4                                    | rs139402                             | 39546145                                       | C | 5q15     | rs56219066 |   | 95242931 | T | 1.25 (1.16-1.34)<br>$r^2 = 0.962$ | $9.6 \times 10^{-10}$<br>$D' = 0.981$ | 1.16 (1.10-1.22)<br>1.17 (1.12-1.22) | $8.06 \times 10^{-8}$<br>$1.57 \times 10^{-11}$  | 5 | rs1423269 | 95255724 | A | 22q13 | rs138740   |  | 35699582 | C | 1.18 (1.11-1.25)<br>$r^2 = 0.955$ | $5.7 \times 10^{-8}$<br>$D' = 0.983$  | 1.11 (1.07-1.16)<br>1.21 (1.13-1.30) | $2.31 \times 10^{-7}$<br>$2.58 \times 10^{-8}$  | 5 | rs138747  | 35700488 | A |       |          |  |          |   |                                   |
| 7p15.3  | rs4487645     | rs4487645                       | 21938240            | C           | 1.38 (1.28-1.50)                  | $3.33 \times 10^{-15}$                | 1.24 (1.19-1.30)                     | $5.30 \times 10^{-25}$                           | 3         |         |            |           |          |   |                                   |                                       |                                      |                                                  |   |            |            |   |           |            |                               |                                    |                                      |                                                  |                                       |                                      |                                                  |   |            |            |   |           |            |                                  |                                       |                                      |                                                  |                                       |                                      |                                                  |   |           |           |   |          |            |                                   |                                       |                                      |                                                  |                                       |                                      |                                                 |   |           |           |   |          |          |                                   |                                       |                                      |                                                  |                                      |                                      |                                                |   |          |            |   |          |   |                                   |                                       |                                      |                                                  |   |           |          |   |       |            |  |          |   |                                   |                                       |                                      |                                                 |   |           |          |   |       |          |  |          |   |                                   |
| 3q26.2  | rs10936599    |                                 | 169492101           | C           | 1.26 (1.18-1.33)<br>$r^2 = 1$     | $8.70 \times 10^{-14}$<br>$D' = 1$    | 1.20 (1.14-1.25)<br>1.20 (1.15-1.26) | $9.35 \times 10^{-15}$<br>$5.94 \times 10^{-15}$ | 4         |         |            |           |          |   |                                   |                                       |                                      |                                                  |   |            |            |   |           |            |                               |                                    |                                      |                                                  |                                       |                                      |                                                  |   |            |            |   |           |            |                                  |                                       |                                      |                                                  |                                       |                                      |                                                  |   |           |           |   |          |            |                                   |                                       |                                      |                                                  |                                       |                                      |                                                 |   |           |           |   |          |          |                                   |                                       |                                      |                                                  |                                      |                                      |                                                |   |          |            |   |          |   |                                   |                                       |                                      |                                                  |   |           |          |   |       |            |  |          |   |                                   |                                       |                                      |                                                 |   |           |          |   |       |          |  |          |   |                                   |
|         |               | rs10936600                      | 169514585           | A           |                                   |                                       |                                      |                                                  |           | 6p21.3  | rs2285803  |           | 31107258 | T | 1.19 (1.13-1.26)<br>$r^2 = 0.94$  | $9.67 \times 10^{-11}$<br>$D' = 0.98$ | 1.19 (1.14-1.24)<br>1.20 (1.15-1.25) | $1.04 \times 10^{-16}$<br>$2.97 \times 10^{-17}$ | 4 | rs3132535  | 31116526   | A | 17p11.2   | rs4273077  |                               | 16849139                           | G                                    | 1.26 (1.16-1.36)<br>$r^2 = 0.904$                | $7.67 \times 10^{-9}$<br>$D' = 0.958$ | 1.29 (1.21-1.37)<br>1.30 (1.23-1.39) | $7.35 \times 10^{-15}$<br>$3.63 \times 10^{-17}$ | 4 | rs34562254 | 16842991   | A | 22q13.1   | rs877529   |                                  | 39542292                              | A                                    | 1.23 (1.17-1.29)<br>$r^2 = 1$                    | $7.63 \times 10^{-16}$<br>$D' = 1$    | 1.23 (1.19-1.28)<br>1.23 (1.19-1.28) | $6.07 \times 10^{-26}$<br>$4.98 \times 10^{-26}$ | 4 | rs139402  | 39546145  | C | 5q15     | rs56219066 |                                   | 95242931                              | T                                    | 1.25 (1.16-1.34)<br>$r^2 = 0.962$                | $9.6 \times 10^{-10}$<br>$D' = 0.981$ | 1.16 (1.10-1.22)<br>1.17 (1.12-1.22) | $8.06 \times 10^{-8}$<br>$1.57 \times 10^{-11}$ | 5 | rs1423269 | 95255724  | A | 22q13    | rs138740 |                                   | 35699582                              | C                                    | 1.18 (1.11-1.25)<br>$r^2 = 0.955$                | $5.7 \times 10^{-8}$<br>$D' = 0.983$ | 1.11 (1.07-1.16)<br>1.21 (1.13-1.30) | $2.31 \times 10^{-7}$<br>$2.58 \times 10^{-8}$ | 5 | rs138747 | 35700488   | A |          |   |                                   |                                       |                                      |                                                  |   |           |          |   |       |            |  |          |   |                                   |                                       |                                      |                                                 |   |           |          |   |       |          |  |          |   |                                   |
| 6p21.3  | rs2285803     |                                 | 31107258            | T           | 1.19 (1.13-1.26)<br>$r^2 = 0.94$  | $9.67 \times 10^{-11}$<br>$D' = 0.98$ | 1.19 (1.14-1.24)<br>1.20 (1.15-1.25) | $1.04 \times 10^{-16}$<br>$2.97 \times 10^{-17}$ | 4         |         |            |           |          |   |                                   |                                       |                                      |                                                  |   |            |            |   |           |            |                               |                                    |                                      |                                                  |                                       |                                      |                                                  |   |            |            |   |           |            |                                  |                                       |                                      |                                                  |                                       |                                      |                                                  |   |           |           |   |          |            |                                   |                                       |                                      |                                                  |                                       |                                      |                                                 |   |           |           |   |          |          |                                   |                                       |                                      |                                                  |                                      |                                      |                                                |   |          |            |   |          |   |                                   |                                       |                                      |                                                  |   |           |          |   |       |            |  |          |   |                                   |                                       |                                      |                                                 |   |           |          |   |       |          |  |          |   |                                   |
|         |               | rs3132535                       | 31116526            | A           |                                   |                                       |                                      |                                                  |           | 17p11.2 | rs4273077  |           | 16849139 | G | 1.26 (1.16-1.36)<br>$r^2 = 0.904$ | $7.67 \times 10^{-9}$<br>$D' = 0.958$ | 1.29 (1.21-1.37)<br>1.30 (1.23-1.39) | $7.35 \times 10^{-15}$<br>$3.63 \times 10^{-17}$ | 4 | rs34562254 | 16842991   | A | 22q13.1   | rs877529   |                               | 39542292                           | A                                    | 1.23 (1.17-1.29)<br>$r^2 = 1$                    | $7.63 \times 10^{-16}$<br>$D' = 1$    | 1.23 (1.19-1.28)<br>1.23 (1.19-1.28) | $6.07 \times 10^{-26}$<br>$4.98 \times 10^{-26}$ | 4 | rs139402   | 39546145   | C | 5q15      | rs56219066 |                                  | 95242931                              | T                                    | 1.25 (1.16-1.34)<br>$r^2 = 0.962$                | $9.6 \times 10^{-10}$<br>$D' = 0.981$ | 1.16 (1.10-1.22)<br>1.17 (1.12-1.22) | $8.06 \times 10^{-8}$<br>$1.57 \times 10^{-11}$  | 5 | rs1423269 | 95255724  | A | 22q13    | rs138740   |                                   | 35699582                              | C                                    | 1.18 (1.11-1.25)<br>$r^2 = 0.955$                | $5.7 \times 10^{-8}$<br>$D' = 0.983$  | 1.11 (1.07-1.16)<br>1.21 (1.13-1.30) | $2.31 \times 10^{-7}$<br>$2.58 \times 10^{-8}$  | 5 | rs138747  | 35700488  | A |          |          |                                   |                                       |                                      |                                                  |                                      |                                      |                                                |   |          |            |   |          |   |                                   |                                       |                                      |                                                  |   |           |          |   |       |            |  |          |   |                                   |                                       |                                      |                                                 |   |           |          |   |       |          |  |          |   |                                   |
| 17p11.2 | rs4273077     |                                 | 16849139            | G           | 1.26 (1.16-1.36)<br>$r^2 = 0.904$ | $7.67 \times 10^{-9}$<br>$D' = 0.958$ | 1.29 (1.21-1.37)<br>1.30 (1.23-1.39) | $7.35 \times 10^{-15}$<br>$3.63 \times 10^{-17}$ | 4         |         |            |           |          |   |                                   |                                       |                                      |                                                  |   |            |            |   |           |            |                               |                                    |                                      |                                                  |                                       |                                      |                                                  |   |            |            |   |           |            |                                  |                                       |                                      |                                                  |                                       |                                      |                                                  |   |           |           |   |          |            |                                   |                                       |                                      |                                                  |                                       |                                      |                                                 |   |           |           |   |          |          |                                   |                                       |                                      |                                                  |                                      |                                      |                                                |   |          |            |   |          |   |                                   |                                       |                                      |                                                  |   |           |          |   |       |            |  |          |   |                                   |                                       |                                      |                                                 |   |           |          |   |       |          |  |          |   |                                   |
|         |               | rs34562254                      | 16842991            | A           |                                   |                                       |                                      |                                                  |           | 22q13.1 | rs877529   |           | 39542292 | A | 1.23 (1.17-1.29)<br>$r^2 = 1$     | $7.63 \times 10^{-16}$<br>$D' = 1$    | 1.23 (1.19-1.28)<br>1.23 (1.19-1.28) | $6.07 \times 10^{-26}$<br>$4.98 \times 10^{-26}$ | 4 | rs139402   | 39546145   | C | 5q15      | rs56219066 |                               | 95242931                           | T                                    | 1.25 (1.16-1.34)<br>$r^2 = 0.962$                | $9.6 \times 10^{-10}$<br>$D' = 0.981$ | 1.16 (1.10-1.22)<br>1.17 (1.12-1.22) | $8.06 \times 10^{-8}$<br>$1.57 \times 10^{-11}$  | 5 | rs1423269  | 95255724   | A | 22q13     | rs138740   |                                  | 35699582                              | C                                    | 1.18 (1.11-1.25)<br>$r^2 = 0.955$                | $5.7 \times 10^{-8}$<br>$D' = 0.983$  | 1.11 (1.07-1.16)<br>1.21 (1.13-1.30) | $2.31 \times 10^{-7}$<br>$2.58 \times 10^{-8}$   | 5 | rs138747  | 35700488  | A |          |            |                                   |                                       |                                      |                                                  |                                       |                                      |                                                 |   |           |           |   |          |          |                                   |                                       |                                      |                                                  |                                      |                                      |                                                |   |          |            |   |          |   |                                   |                                       |                                      |                                                  |   |           |          |   |       |            |  |          |   |                                   |                                       |                                      |                                                 |   |           |          |   |       |          |  |          |   |                                   |
| 22q13.1 | rs877529      |                                 | 39542292            | A           | 1.23 (1.17-1.29)<br>$r^2 = 1$     | $7.63 \times 10^{-16}$<br>$D' = 1$    | 1.23 (1.19-1.28)<br>1.23 (1.19-1.28) | $6.07 \times 10^{-26}$<br>$4.98 \times 10^{-26}$ | 4         |         |            |           |          |   |                                   |                                       |                                      |                                                  |   |            |            |   |           |            |                               |                                    |                                      |                                                  |                                       |                                      |                                                  |   |            |            |   |           |            |                                  |                                       |                                      |                                                  |                                       |                                      |                                                  |   |           |           |   |          |            |                                   |                                       |                                      |                                                  |                                       |                                      |                                                 |   |           |           |   |          |          |                                   |                                       |                                      |                                                  |                                      |                                      |                                                |   |          |            |   |          |   |                                   |                                       |                                      |                                                  |   |           |          |   |       |            |  |          |   |                                   |                                       |                                      |                                                 |   |           |          |   |       |          |  |          |   |                                   |
|         |               | rs139402                        | 39546145            | C           |                                   |                                       |                                      |                                                  |           | 5q15    | rs56219066 |           | 95242931 | T | 1.25 (1.16-1.34)<br>$r^2 = 0.962$ | $9.6 \times 10^{-10}$<br>$D' = 0.981$ | 1.16 (1.10-1.22)<br>1.17 (1.12-1.22) | $8.06 \times 10^{-8}$<br>$1.57 \times 10^{-11}$  | 5 | rs1423269  | 95255724   | A | 22q13     | rs138740   |                               | 35699582                           | C                                    | 1.18 (1.11-1.25)<br>$r^2 = 0.955$                | $5.7 \times 10^{-8}$<br>$D' = 0.983$  | 1.11 (1.07-1.16)<br>1.21 (1.13-1.30) | $2.31 \times 10^{-7}$<br>$2.58 \times 10^{-8}$   | 5 | rs138747   | 35700488   | A |           |            |                                  |                                       |                                      |                                                  |                                       |                                      |                                                  |   |           |           |   |          |            |                                   |                                       |                                      |                                                  |                                       |                                      |                                                 |   |           |           |   |          |          |                                   |                                       |                                      |                                                  |                                      |                                      |                                                |   |          |            |   |          |   |                                   |                                       |                                      |                                                  |   |           |          |   |       |            |  |          |   |                                   |                                       |                                      |                                                 |   |           |          |   |       |          |  |          |   |                                   |
| 5q15    | rs56219066    |                                 | 95242931            | T           | 1.25 (1.16-1.34)<br>$r^2 = 0.962$ | $9.6 \times 10^{-10}$<br>$D' = 0.981$ | 1.16 (1.10-1.22)<br>1.17 (1.12-1.22) | $8.06 \times 10^{-8}$<br>$1.57 \times 10^{-11}$  | 5         |         |            |           |          |   |                                   |                                       |                                      |                                                  |   |            |            |   |           |            |                               |                                    |                                      |                                                  |                                       |                                      |                                                  |   |            |            |   |           |            |                                  |                                       |                                      |                                                  |                                       |                                      |                                                  |   |           |           |   |          |            |                                   |                                       |                                      |                                                  |                                       |                                      |                                                 |   |           |           |   |          |          |                                   |                                       |                                      |                                                  |                                      |                                      |                                                |   |          |            |   |          |   |                                   |                                       |                                      |                                                  |   |           |          |   |       |            |  |          |   |                                   |                                       |                                      |                                                 |   |           |          |   |       |          |  |          |   |                                   |
|         |               | rs1423269                       | 95255724            | A           |                                   |                                       |                                      |                                                  |           | 22q13   | rs138740   |           | 35699582 | C | 1.18 (1.11-1.25)<br>$r^2 = 0.955$ | $5.7 \times 10^{-8}$<br>$D' = 0.983$  | 1.11 (1.07-1.16)<br>1.21 (1.13-1.30) | $2.31 \times 10^{-7}$<br>$2.58 \times 10^{-8}$   | 5 | rs138747   | 35700488   | A |           |            |                               |                                    |                                      |                                                  |                                       |                                      |                                                  |   |            |            |   |           |            |                                  |                                       |                                      |                                                  |                                       |                                      |                                                  |   |           |           |   |          |            |                                   |                                       |                                      |                                                  |                                       |                                      |                                                 |   |           |           |   |          |          |                                   |                                       |                                      |                                                  |                                      |                                      |                                                |   |          |            |   |          |   |                                   |                                       |                                      |                                                  |   |           |          |   |       |            |  |          |   |                                   |                                       |                                      |                                                 |   |           |          |   |       |          |  |          |   |                                   |
| 22q13   | rs138740      |                                 | 35699582            | C           | 1.18 (1.11-1.25)<br>$r^2 = 0.955$ | $5.7 \times 10^{-8}$<br>$D' = 0.983$  | 1.11 (1.07-1.16)<br>1.21 (1.13-1.30) | $2.31 \times 10^{-7}$<br>$2.58 \times 10^{-8}$   | 5         |         |            |           |          |   |                                   |                                       |                                      |                                                  |   |            |            |   |           |            |                               |                                    |                                      |                                                  |                                       |                                      |                                                  |   |            |            |   |           |            |                                  |                                       |                                      |                                                  |                                       |                                      |                                                  |   |           |           |   |          |            |                                   |                                       |                                      |                                                  |                                       |                                      |                                                 |   |           |           |   |          |          |                                   |                                       |                                      |                                                  |                                      |                                      |                                                |   |          |            |   |          |   |                                   |                                       |                                      |                                                  |   |           |          |   |       |            |  |          |   |                                   |                                       |                                      |                                                 |   |           |          |   |       |          |  |          |   |                                   |
|         |               | rs138747                        | 35700488            | A           |                                   |                                       |                                      |                                                  |           |         |            |           |          |   |                                   |                                       |                                      |                                                  |   |            |            |   |           |            |                               |                                    |                                      |                                                  |                                       |                                      |                                                  |   |            |            |   |           |            |                                  |                                       |                                      |                                                  |                                       |                                      |                                                  |   |           |           |   |          |            |                                   |                                       |                                      |                                                  |                                       |                                      |                                                 |   |           |           |   |          |          |                                   |                                       |                                      |                                                  |                                      |                                      |                                                |   |          |            |   |          |   |                                   |                                       |                                      |                                                  |   |           |          |   |       |            |  |          |   |                                   |                                       |                                      |                                                 |   |           |          |   |       |          |  |          |   |                                   |

**Supplementary Table 3: Strongest association signals from previously published risk loci discovered in European populations<sup>3-5</sup>.** Shown for each region are the published SNP, the most associated variant within a 500kb window in the imputation and the odds ratio and *P* values associated with each, along with the linkage disequilibrium metrics between the SNPs. Meta-analysis for current GWAS was undertaken using the inverse-variance approach under a fixed effects model.

| SNP                    |                | rs34229995            | rs9372120              | rs7781265             | rs1948915              | rs2811710              | rs2790457             | rs7193541             | rs6066835             |
|------------------------|----------------|-----------------------|------------------------|-----------------------|------------------------|------------------------|-----------------------|-----------------------|-----------------------|
| Locus                  |                | 6p22.3                | 6q21                   | 7q36.1                | 8q24.21                | 9p21.3                 | 10p12.1               | 16q23.1               | 20q13.13              |
| Position (bp, hg19)    |                | 15,244,018            | 106,667,535            | 150,950,940           | 128,222,421            | 21,991,923             | 28,856,819            | 74,664,743            | 47,355,009            |
| Allele A               |                | C                     | T                      | C                     | T                      | A                      | A                     | C                     | T                     |
| Allele B (Risk Allele) |                | G                     | G                      | T                     | C                      | G                      | G                     | T                     | C                     |
| UK                     | Cases RAF      | 0.024                 | 0.236                  | 0.128                 | 0.332                  | 0.666                  | 0.751                 | 0.628                 | 0.100                 |
|                        | Controls RAF   | 0.019                 | 0.211                  | 0.117                 | 0.319                  | 0.634                  | 0.733                 | 0.584                 | 0.083                 |
|                        | OR             | 1.28                  | 1.16                   | 1.11                  | 1.06                   | 1.16                   | 1.10                  | 1.20                  | 1.25                  |
|                        | <i>P</i> value | 0.0525                | $6.72 \times 10^{-4}$  | 0.0578                | 0.109                  | $1.24 \times 10^{-4}$  | 0.0149                | $5.97 \times 10^{-7}$ | $3.83 \times 10^{-4}$ |
| Sweden/<br>Norway      | Cases RAF      | 0.045                 | 0.243                  |                       | 0.386                  | 0.681                  | 0.750                 | 0.598                 | 0.097                 |
|                        | Controls RAF   | 0.033                 | 0.217                  |                       | 0.363                  | 0.660                  | 0.735                 | 0.572                 | 0.075                 |
|                        | OR             | 1.44                  | 1.22                   |                       | 1.12                   | 1.14                   | 1.11                  | 1.07                  | 1.38                  |
|                        | <i>P</i> value | $4.37 \times 10^{-4}$ | $9.96 \times 10^{-6}$  | Info<0.8              | $2.97 \times 10^{-3}$  | $1.38 \times 10^{-3}$  | 0.0160                | 0.0612                | $6.20 \times 10^{-6}$ |
| Germany                | Cases RAF      | 0.039                 | 0.226                  | 0.144                 | 0.357                  | 0.678                  | 0.757                 | 0.596                 | 0.095                 |
|                        | Controls RAF   | 0.028                 | 0.207                  | 0.118                 | 0.331                  | 0.654                  | 0.728                 | 0.590                 | 0.077                 |
|                        | OR             | 1.49                  | 1.18                   | 1.33                  | 1.22                   | 1.15                   | 1.15                  | 1.02                  | 1.24                  |
|                        | <i>P</i> value | $9.03 \times 10^{-3}$ | 0.0124                 | $3.22 \times 10^{-4}$ | $3.13 \times 10^{-4}$  | 0.0119                 | 0.0224                | 0.645                 | 0.0240                |
| Iceland                | Cases RAF      |                       |                        |                       |                        |                        |                       |                       |                       |
|                        | Controls RAF   |                       |                        |                       |                        |                        |                       |                       |                       |
|                        | OR             | 1.32                  | 1.19                   | 1.14                  | 1.21                   | 1.06                   | 1.19                  | 1.14                  | 1.08                  |
|                        | <i>P</i> value | 0.0110                | 0.0501                 | 0.190                 | 0.0153                 | 0.440                  | 0.0402                | 0.0907                | 0.535                 |
| USA                    | Cases RAF      | 0.036                 | 0.239                  | 0.159                 | 0.362                  | 0.669                  | 0.761                 | 0.604                 | 0.105                 |
|                        | Controls RAF   | 0.023                 | 0.202                  | 0.120                 | 0.313                  | 0.637                  | 0.732                 | 0.584                 | 0.082                 |
|                        | OR             | 1.61                  | 1.25                   | 1.45                  | 1.25                   | 1.16                   | 1.17                  | 1.09                  | 1.33                  |
|                        | <i>P</i> value | 0.0110                | $2.46 \times 10^{-3}$  | $6.56 \times 10^{-5}$ | $5.35 \times 10^{-4}$  | 0.0258                 | 0.0232                | 0.166                 | $7.11 \times 10^{-3}$ |
| Netherlands            | Cases RAF      | 0.031                 | 0.239                  | 0.137                 | 0.363                  | 0.682                  | 0.749                 | 0.616                 | 0.081                 |
|                        | Controls RAF   | 0.024                 | 0.204                  | 0.124                 | 0.329                  | 0.658                  | 0.742                 | 0.570                 | 0.085                 |
|                        | OR             | 1.32                  | 1.23                   | 1.12                  | 1.17                   | 1.12                   | 1.04                  | 1.21                  | 0.95                  |
|                        | <i>P</i> value | 0.192                 | $9.45 \times 10^{-3}$  | 0.240                 | 0.0258                 | 0.113                  | 0.620                 | $4.36 \times 10^{-3}$ | 0.687                 |
| Meta                   | OR             | 1.40                  | 1.20                   | 1.20                  | 1.14                   | 1.14                   | 1.12                  | 1.12                  | 1.24                  |
|                        | (95% CI)       | (1.25-1.58)           | (1.14-1.26)            | (1.12-1.29)           | (1.10-1.19)            | (1.09-1.19)            | (1.07-1.17)           | (1.08-1.17)           | (1.16-1.33)           |
|                        | <i>P</i> value | $1.76 \times 10^{-8}$ | $8.72 \times 10^{-14}$ | $1.82 \times 10^{-7}$ | $3.14 \times 10^{-10}$ | $6.50 \times 10^{-10}$ | $8.44 \times 10^{-7}$ | $1.14 \times 10^{-8}$ | $1.16 \times 10^{-9}$ |

**Supplementary Table 4: Summary statistics for novel variants showing an association with multiple myeloma risk in the GWAS meta-analysis at  $P < 1.0 \times 10^{-6}$ . Showing SNPs which were genome-wide significant after replication.** Odds ratios derived with respect to the risk allele. Cases RAF, risk allele frequency in discovery cases. Controls RAF, risk allele frequency in discovery controls. Shown are discovery association  $P$  values for individual studies (logistic regression) and from meta-analysis of the six GWAS datasets (inverse-variance approach under a fixed effects model).

| SNP                    |                | rs78311596            | rs72665486            | rs1034447             | rs17507636            | rs28571765            | rs76601148            | rs8058578             | rs6071887             |
|------------------------|----------------|-----------------------|-----------------------|-----------------------|-----------------------|-----------------------|-----------------------|-----------------------|-----------------------|
| Locus                  |                | 1p13.2                | 4q22.1                | 6q27                  | 7q22.3                | 8q11.23               | 13q13.3               | 16p11.2               | 20q12                 |
| Position (bp, hg19)    |                | 113,300,945           | 91,913,730            | 164,613,457           | 106,291,118           | 55,449,281            | 36,746,056            | 30,726,248            | 38,621,456            |
| Allele A               |                | A                     | T                     | C                     | T                     | C                     | A                     | C                     | G                     |
| Allele B (Risk Allele) |                | T                     | G                     | T                     | C                     | T                     | G                     | T                     | A                     |
| UK                     | Cases RAF      | 0.029                 | 0.882                 | 0.163                 | 0.760                 | 0.808                 | 0.049                 | 0.280                 | 0.258                 |
|                        | Controls RAF   | 0.022                 | 0.874                 | 0.148                 | 0.745                 | 0.794                 | 0.041                 | 0.255                 | 0.238                 |
|                        | OR             | 1.34                  | 1.07                  | 1.13                  | 1.08                  | 1.09                  | 1.07                  | 1.14                  | 1.11                  |
|                        | <i>P</i> value | 0.0138                | 0.180                 | 0.0148                | 0.0476                | 0.0532                | 0.0152                | $1.34 \times 10^{-3}$ | $8.42 \times 10^{-3}$ |
| Sweden/<br>Norway      | Cases RAF      |                       | 0.907                 | 0.158                 | 0.778                 | 0.797                 | 0.051                 | 0.283                 | 0.225                 |
|                        | Controls RAF   |                       | 0.886                 | 0.127                 | 0.765                 | 0.773                 | 0.038                 | 0.261                 | 0.208                 |
|                        | OR             |                       | 1.25                  | 1.27                  | 1.09                  | 1.13                  | 1.39                  | 1.11                  | 1.11                  |
|                        | <i>P</i> value | MAF<0.005             | $2.14 \times 10^{-4}$ | $1.40 \times 10^{-5}$ | 0.0436                | $8.80 \times 10^{-3}$ | $6.57 \times 10^{-4}$ | 0.0126                | 0.0199                |
| Germany                | Cases RAF      | 0.020                 | 0.907                 | 0.142                 | 0.745                 | 0.825                 | 0.039                 | 0.281                 | 0.220                 |
|                        | Controls RAF   | 0.016                 | 0.883                 | 0.138                 | 0.714                 | 0.812                 | 0.033                 | 0.261                 | 0.213                 |
|                        | OR             | 1.449                 | 1.36112               | 1.0950                | 1.13882               | 1.09694               | 1.4424                | 1.0979                | 1.06395               |
|                        | <i>P</i> value | 0.0733                | $2.9 \times 10^{-4}$  | 0.238                 | 0.0281                | 0.175                 | 0.0111                | 0.115                 | 0.331                 |
| Iceland                | Cases RAF      |                       |                       |                       |                       |                       |                       |                       |                       |
|                        | Controls RAF   |                       |                       |                       |                       |                       |                       |                       |                       |
|                        | OR             | 1.71                  | 1.21                  | 1.13                  | 1.06                  | 1.30                  | 1.07                  | 1.19                  | 1.12                  |
|                        | <i>P</i> value | $1.47 \times 10^{-3}$ | 0.0970                | 0.226                 | 0.491                 | $3.75 \times 10^{-3}$ | 0.692                 | 0.0350                | 0.213                 |
| USA                    | Cases RAF      | 0.027                 | 0.887                 | 0.144                 | 0.785                 | 0.826                 | 0.051                 | 0.273                 | 0.267                 |
|                        | Controls RAF   | 0.017                 | 0.884                 | 0.136                 | 0.737                 | 0.789                 | 0.041                 | 0.254                 | 0.231                 |
|                        | OR             | 1.73                  | 1.02                  | 1.06                  | 1.30                  | 1.26                  | 1.28                  | 1.10                  | 1.22                  |
|                        | <i>P</i> value | 0.0132                | 0.811                 | 0.489                 | $2.03 \times 10^{-4}$ | $2.31 \times 10^{-3}$ | 0.0963                | 0.160                 | $4.90 \times 10^{-3}$ |
| Netherlands            | Cases RAF      | 0.026                 | 0.896                 | 0.153                 | 0.764                 | 0.825                 | 0.059                 | 0.259                 | 0.251                 |
|                        | Controls RAF   | 0.021                 | 0.878                 | 0.141                 | 0.735                 | 0.803                 | 0.043                 | 0.245                 | 0.221                 |
|                        | OR             | 1.26                  | 1.19                  | 1.10                  | 1.16                  | 1.16                  | 1.45                  | 1.07                  | 1.17                  |
|                        | <i>P</i> value | 0.321                 | 0.0870                | 0.300                 | 0.0440                | 0.0776                | 0.0206                | 0.259                 | 0.0380                |
| Meta                   | OR             | 1.46                  | 1.17                  | 1.15                  | 1.12                  | 1.14                  | 1.31                  | 1.12                  | 1.12                  |
|                        | (95% CI)       | (1.25-1.69)           | (1.10-1.24)           | (1.09-1.22)           | (1.07-1.17)           | (1.08-1.19)           | (1.19-1.45)           | (1.07-1.17)           | (1.07-1.18)           |
|                        | <i>P</i> value | $9.40 \times 10^{-7}$ | $4.81 \times 10^{-7}$ | $8.21 \times 10^{-7}$ | $5.54 \times 10^{-7}$ | $1.30 \times 10^{-7}$ | $5.90 \times 10^{-8}$ | $5.57 \times 10^{-7}$ | $7.08 \times 10^{-7}$ |

**Supplementary Table 5: Summary statistics for novel variants showing an association with multiple myeloma risk in the GWAS meta-analysis at  $P < 1.0 \times 10^{-6}$ . Showing SNPs which were not genome-wide significant after replication.** Odds ratios derived with respect to the risk allele. Cases RAF, risk allele frequency in discovery cases. Controls RAF, risk allele frequency in discovery controls. Shown are discovery association  $P$  values for individual studies (logistic regression) and from meta-analysis of the six GWAS datasets (inverse-variance approach under a fixed effects model).

| SNP           |       | rs34229995 | rs9372120 | rs7781265 | rs1948915 | rs2811710 | rs2790457 | rs7193541 | rs6066835 |
|---------------|-------|------------|-----------|-----------|-----------|-----------|-----------|-----------|-----------|
| UK Cases      | AA    | 164/164    | 105/105   | 126/127   | 77/77     | 61/62     | 97/97     | Genotyped | 130/130   |
|               | Aa    | 7/7        | 57/59     | 39/40     | 68/68     | 71/73     | 65/65     |           | 41/41     |
|               | aa    | 2/2        | 7/7       | 3/3       | 13/14     | 23/23     | 12/12     |           | 2/2       |
|               | $r^2$ | 1.00       | 1.0       | 0.97      | 0.99      | 0.98      | 1.00      |           | 1.00      |
| UK Controls   | AA    | 146/146    | 110/110   | 123/123   | 75/77     | 69/70     | 85/87     |           | 142/142   |
|               | Aa    | 16/16      | 52/52     | 30/32     | 64/64     | 62/63     | 63/64     |           | 21/21     |
|               | aa    | 1/1        | 1/1       | 2/2       | 12/13     | 15/16     | 12/12     |           | NA        |
|               | $r^2$ | 1.00       | 1.00      | 0.97      | 0.98      | 0.98      | 0.99      |           | 1.00      |
| Germany Cases | AA    | 314/314    | 193/193   | 250/254   | 135/136   | 146/153   | 184/185   |           | 279/279   |
|               | Aa    | 20/20      | 124/125   | 68/70     | 142/148   | 134/138   | 124/124   |           | 53/55     |
|               | aa    | 1/1        | 12/12     | 6/6       | 36/38     | 26/27     | 26/26     |           | 3/3       |
|               | $r^2$ | 1.00       | 0.99      | 0.95      | 0.97      | 0.94      | 1.00      |           | 0.98      |
| USA Cases     | AA    | 692/692    | 428/431   | 494/506   | 307/308   | 308/314   | 420/421   |           | 591/591   |
|               | Aa    | 50/50      | 268/269   | 149/159   | 320/322   | 296/299   | 276/278   |           | 143/143   |
|               | aa    | 2/2        | 41/41     | 13/14     | 103/104   | 72/74     | 38/38     |           | 6/6       |
|               | $r^2$ | 1.00       | 0.98      | 0.86      | 0.99      | 0.96      | 0.99      |           | 1.0       |

**Supplementary Table 6: Concordance between directly sequenced and imputed genotype. Showing SNPs which were genome-wide significant after replication.** AA, major homozygote; AB, heterozygote; BB, minor homozygote.  $r^2$  indicates Pearson product-moment correlation coefficient between imputed and sequenced genotype.

| Study            | Genotype | rs78311596 | rs72665486 | rs1034447 | rs17507636 | rs28571765 | rs76601148 | rs8058578 | rs6071887 |
|------------------|----------|------------|------------|-----------|------------|------------|------------|-----------|-----------|
| UK<br>Cases      | AA       | 166/166    | 127/127    | 120/120   | Genotyped  | 108/108    | 151/151    | Genotyped | 97/97     |
|                  | Aa       | 8/9        | 35/35      | 48/48     |            | 61/62      | 22/22      |           | 59/59     |
|                  | aa       | N/A        | 3/3        | 6/6       |            | 4/4        | 2/2        |           | 15/15     |
|                  | $r^2$    | 0.94       | 1.00       | 1.00      |            | 0.99       | 1.00       |           | 1.00      |
| UK<br>Controls   | AA       | 142/142    | 124/125    | 126/126   | 101/101    | 105/105    |            |           | 85/85     |
|                  | Aa       | 17/18      | 37/37      | 35/35     | 52/52      | 56/56      |            |           | 70/70     |
|                  | aa       | 2/2        | 1/1        | 1/1       | 8/8        | 2/2        |            |           | 3/3       |
|                  | $r^2$    | 0.98       | 1.00       | 1.00      | 1.00       | 1.00       |            |           | 1.00      |
| Germany<br>Cases | AA       | 318/318    | 138/138    | 246/247   |            | 228/229    | 317/318    |           | 189/202   |
|                  | Aa       | 9/9        | 32/32      | 87/87     |            | 91/91      | 19/20      |           | 109/109   |
|                  | aa       | NA         | NA         | 5/5       |            | 9/9        | NA         |           | 14/14     |
|                  | $r^2$    | 1.00       | 1.00       | 0.99      |            | 0.99       | 0.97       |           | 0.91      |
| USA<br>Cases     | AA       | 704/705    | 587/587    | 539/540   |            | 512/512    | 672/672    |           | 396/396   |
|                  | Aa       | 28/34      | 154/154    | 189/191   |            | 193/193    | 71/71      |           | 93/293    |
|                  | aa       | 1/1        | 8/9        | 10/10     |            | 29/29      | 2/2        |           | 49/49     |
|                  | $r^2$    | 0.80       | 0.99       | 0.98      |            | 1.0        | 1.0        |           | 1.0       |

**Supplementary Table 7: Concordance between directly sequenced and imputed genotype. Showing SNPs which were not genome-wide significant after replication.** AA, major homozygote; AB, heterozygote; BB, minor homozygote.  $r^2$  indicates Pearson product-moment correlation coefficient between imputed and sequenced genotype.

| SNP                           |                | rs34229995            | rs9372120              | rs7781265             | rs1948915              | rs2811710              | rs2790457             | rs7193541              | rs6066835              |
|-------------------------------|----------------|-----------------------|------------------------|-----------------------|------------------------|------------------------|-----------------------|------------------------|------------------------|
| Locus                         |                | 6p22.3                | 6q21                   | 7q36.1                | 8q24.21                | 9p21.3                 | 10p12.1               | 16q23.1                | 20q13.13               |
| Position (bp, hg19)           |                | 15,244,018            | 106,667,535            | 150,950,940           | 128,222,421            | 21,991,923             | 28,856,819            | 74,664,743             | 47,355,009             |
| Allele A                      |                | C                     | T                      | C                     | T                      | A                      | A                     | C                      | T                      |
| Allele B (Risk Allele)        |                | G                     | G                      | T                     | C                      | G                      | G                     | T                      | C                      |
| UK                            | Cases RAF      | 0.022                 | 0.234                  | 0.136                 | 0.332                  | 0.666                  | 0.752                 | 0.63                   | 0.101                  |
|                               | Controls RAF   | 0.020                 | 0.210                  | 0.113                 | 0.309                  | 0.634                  | 0.733                 | 0.58                   | 0.083                  |
|                               | OR             | 1.14                  | 1.15                   | 1.23                  | 1.11                   | 1.12                   | 1.07                  | 1.11                   | 1.37                   |
|                               | <i>P</i> value | 0.576                 | 0.091                  | 0.043                 | 0.151                  | 0.106                  | 0.423                 | 0.147                  | 0.008                  |
| Sweden/Norway                 | Cases RAF      | 0.010                 | 0.210                  | 0.143                 | 0.404                  | 0.710                  | 0.758                 | 0.618                  | 0.070                  |
|                               | Controls RAF   | 0.020                 | 0.201                  | 0.125                 | 0.366                  | 0.666                  | 0.729                 | 0.583                  | 0.071                  |
|                               | OR             | 0.59                  | 1.052                  | 1.171                 | 1.17                   | 1.23                   | 1.17                  | 1.156                  | 0.99                   |
|                               | <i>P</i> value | 0.128                 | 0.677                  | 0.267                 | 0.106                  | 0.053                  | 0.164                 | 0.142                  | 0.974                  |
| Germany                       | Cases RAF      | 0.024                 | 0.211                  | 0.134                 | 0.350                  | 0.669                  | 0.759                 | 0.614                  | 0.102                  |
|                               | Controls RAF   | 0.015                 | 0.197                  | 0.127                 | 0.330                  | 0.630                  | 0.727                 | 0.565                  | 0.805                  |
|                               | OR             | 1.60                  | 1.09                   | 1.06                  | 1.10                   | 1.19                   | 1.190                 | 1.22                   | 1.29                   |
|                               | <i>P</i> value | 0.03                  | 0.26                   | 0.51                  | 0.16                   | 0.009                  | 0.02                  | 0.001                  | 0.015                  |
| Denmark                       | Cases RAF      | 0.012                 | 0.229                  | 0.147                 | 0.365                  | 0.698                  | 0.751                 | 0.616                  | 0.121                  |
|                               | Controls RAF   | 0.012                 | 0.199                  | 0.121                 | 0.366                  | 0.651                  | 0.733                 | 0.590                  | 0.074                  |
|                               | OR             | 1.062                 | 1.19                   | 1.25                  | 1.00                   | 1.24                   | 1.10                  | 1.114                  | 1.71                   |
|                               | <i>P</i> value | 0.870                 | 0.081                  | 0.069                 | 0.960                  | 0.019                  | 0.349                 | 0.228                  | $1 \times 10^{-4}$     |
| Discovery phase + replication | OR             | 1.37                  | 1.18                   | 1.19                  | 1.13                   | 1.15                   | 1.12                  | 1.13                   | 1.26                   |
|                               | <i>P</i> value | $1.31 \times 10^{-8}$ | $9.09 \times 10^{-15}$ | $9.71 \times 10^{-9}$ | $4.20 \times 10^{-11}$ | $1.72 \times 10^{-13}$ | $1.77 \times 10^{-8}$ | $5.00 \times 10^{-12}$ | $1.36 \times 10^{-13}$ |

**Supplementary Table 8: Replication of top association signals. Showing SNPs which were genome-wide significant after replication.** Cases RAF, risk allele frequency of replication cases; Control RAF, risk allele frequency of replication controls. *P* values are shown for each replication series (logistic regression) and for the meta-analysis of the 6 discovery datasets and the four replication series combined (inverse-variance approach under a fixed effects model).



| SNP                           |                | rs72665486            | rs1034447             | rs17507636            | rs28571765            | rs76601148            | rs8058578             | rs6071887             |
|-------------------------------|----------------|-----------------------|-----------------------|-----------------------|-----------------------|-----------------------|-----------------------|-----------------------|
| Locus                         |                | 4q22.1                | 6q27                  | 7q22.3                | 8q11.23               | 13q13.3               | 16p11.2               | 20q12                 |
| Position (bp, hg19)           |                | 91,913,730            | 164,613,457           | 106,291,118           | 55,449,281            | 36,746,056            | 30,726,248            | 38,621,456            |
| Allele A                      |                | T                     | C                     | T                     | C                     | A                     | C                     | G                     |
| Allele B (Risk Allele)        |                | G                     | T                     | C                     | T                     | G                     | T                     | A                     |
| UK                            | Cases RAF      | 0.882                 | 0.163                 | 0.760                 | 0.808                 | 0.049                 | 0.280                 | 0.258                 |
|                               | Controls RAF   | 0.874                 | 0.148                 | 0.745                 | 0.794                 | 0.041                 | 0.255                 | 0.238                 |
|                               | OR             | 1.07                  | 1.02                  | 1.09                  | 1.15                  | 1.07                  | 1.15                  | 1.10                  |
|                               | <i>P</i> value | 0.440                 | 0.812                 | 0.312                 | 0.098                 | 0.694                 | 0.064                 | 0.214                 |
| Sweden/Norway                 | Cases RAF      | 0.871                 | 0.155                 | 0.784                 | 0.790                 | 0.040                 | Genotyping            | 0.188                 |
|                               | Controls RAF   | 0.879                 | 0.139                 | 0.764                 | 0.785                 | 0.039                 | failed                | 0.212                 |
|                               | OR             | 0.93                  | 1.14                  | 1.27                  | 1.03                  | 1.04                  |                       | 0.86                  |
|                               | <i>P</i> value | 0.639                 | 0.400                 | 0.308                 | 0.784                 | 0.882                 |                       | 0.236                 |
| Germany                       | Cases RAF      | 0.893                 | 0.138                 | 0.760                 | 0.810                 | 0.366                 | 0.296                 | 0.232                 |
|                               | Controls RAF   | 0.884                 | 0.131                 | 0.735                 | 0.807                 | 0.410                 | 0.304                 | 0.216                 |
|                               | OR             | 1.10                  | 1.06                  | 1.15                  | 1.02                  | 0.89                  | 0.96                  | 1.10                  |
|                               | <i>P</i> value | 0.34                  | 0.51                  | 0.06                  | 0.81                  | 0.47                  | 0.59                  | 0.23                  |
| Denmark                       | Cases RAF      | 0.884                 | 0.168                 | 0.734                 | 0.766                 | 0.033                 | Genotyping            | 0.223                 |
|                               | Controls RAF   | 0.889                 | 0.146                 | 0.751                 | 0.80                  | 0.039                 | failed                | 0.215                 |
|                               | OR             | 0.95                  | 1.18                  | 0.93                  | 0.79                  | 0.85                  |                       | 1.05                  |
|                               | <i>P</i> value | 0.709                 | 0.171                 | 0.434                 | 0.0182                | 0.455                 |                       | 0.654                 |
| Discovery phase + replication | OR             | 1.14                  | 1.13                  | 1.11                  | 1.10                  | 1.23                  | 1.10                  | 1.11                  |
|                               | <i>P</i> value | $2.15 \times 10^{-6}$ | $4.81 \times 10^{-7}$ | $1.58 \times 10^{-7}$ | $1.58 \times 10^{-6}$ | $4.46 \times 10^{-6}$ | $9.68 \times 10^{-7}$ | $6.47 \times 10^{-7}$ |

**Supplementary Table 9: Replication of top association signals. Showing SNPs which were not genome-wide significant after replication.** Cases RAF, risk allele frequency of replication cases; Control RAF, risk allele frequency of replication controls. *P* values are shown for each replication series (logistic regression) and for the meta-analysis of the 6 discovery datasets and the four replication series combined (inverse-variance approach under a fixed effects model).

| Cancer                           | SNP        | Reference | Previously Reported |                        | Current MM GWAS |                      | LD with rs1948915     |                      |
|----------------------------------|------------|-----------|---------------------|------------------------|-----------------|----------------------|-----------------------|----------------------|
|                                  |            |           | Risk Allele         | <i>P</i> value         | Risk Allele     | <i>P</i> value       | <i>r</i> <sup>2</sup> | <i>D'</i>            |
| Hodgkin's Lymphoma               | rs2019960  | 6         | C                   | $7 \times 10^{-8}$     | C               | 0.024                | $1.9 \times 10^{-5}$  | -0.012               |
| Colorectal Cancer                | rs6983267  | 7         | G                   | $5 \times 10^{-14}$    | T               | 0.17                 | $8.7 \times 10^{-4}$  | -0.046               |
| Prostate Cancer                  | rs1447295  | 8         | A                   | $6 \times 10^{-18}$    | C               | 0.55                 | $1.6 \times 10^{-4}$  | 0.055                |
| Prostate Cancer                  | rs12682344 | 8         | G                   | $5 \times 10^{-12}$    | G               | 0.48                 | $5.2 \times 10^{-3}$  | -0.57                |
| Prostate Cancer<br>(early onset) | rs10505477 | 9         | A                   | $9 \times 10^{-9}$     | G               | 0.11                 | $1.1 \times 10^{-3}$  | -0.051               |
| Colorectal Cancer                | rs10505477 | 10        | T                   | $8 \times 10^{-13}$    | G               | 0.11                 | $1.1 \times 10^{-3}$  | -0.051               |
| Breast Cancer (early<br>onset)   | rs2392780  | 11        |                     | $1 \times 10^{-8}$     | G               | 0.86                 | $1.0 \times 10^{-3}$  | 0.039                |
| Renal cell carcinoma             | rs6470589  | 12        | G                   | $5 \times 10^{-11}$    | G               | 0.82                 |                       |                      |
| Bladder Cancer                   | rs9642880  | 13        | T                   | $4 \times 10^{-38}$    | T               | 0.17                 | $3.9 \times 10^{-5}$  | $8.6 \times 10^{-3}$ |
| Chronic lymphocytic<br>leukemia  | rs2466035  | 14        | C                   | $2 \times 10^{-8}$     | C               | $3.6 \times 10^{-3}$ | 0.15                  | 0.39                 |
| Breast Cancer                    | rs13281615 | 15        | G                   | $1 \times 10^{-17}$    | G               | 0.076                | $6.8 \times 10^{-4}$  | -0.046               |
| Breast Cancer                    | rs11780156 | 15        | T                   | $3 \times 10^{-11}$    | T               | 0.22                 | $2.8 \times 10^{-5}$  | 0.0076               |
| Ovarian Cancer                   | rs10088218 | 16        |                     | $1 \times 10^{-17}$    | A               | 0.86                 | $1.0 \times 10^{-3}$  | -0.13                |
| Prostate Cancer                  | rs6983561  | 17        | C                   | $4 \times 10^{-13}$    | C               | 0.47                 | $4.9 \times 10^{-3}$  | -0.55                |
| Prostate Cancer                  | rs13254738 | 18        | C                   | $4 \times 10^{-10}$    | A               | 0.43                 | 0.030                 | -0.17                |
| Prostate Cancer                  | rs4242384  | 19        | C                   | $3 \times 10^{-16}$    | A               | 0.57                 | $2.1 \times 10^{-4}$  | 0.063                |
| Prostate Cancer                  | rs1016343  | 19        | T                   | $4 \times 10^{-10}$    | T               | 0.63                 | 0.015                 | 0.16                 |
| Glioma                           | rs4295627  | 20        | G                   | $5 \times 10^{-21}$    | G               | $5.4 \times 10^{-3}$ | $6.3 \times 10^{-4}$  | 0.0047               |
| Breast Cancer                    | rs1562430  | 21        | A                   | $3 \times 10^{-11}$    | C               | 0.65                 | $8.9 \times 10^{-4}$  | 0.037                |
| Prostate Cancer                  | rs1456315  | 22        | A                   | $2 \times 10^{-29}$    | C               | 0.26                 | 0.028                 | -0.17                |
| Prostate Cancer                  | rs7837688  | 22        | T                   | $1 \times 10^{-25}$    | G               | 0.68                 | $3.7 \times 10^{-4}$  | 0.083                |
| Prostate Cancer                  | rs16902094 | 23        | G                   | $6 \times 10^{-15}$    | G               | 0.74                 | $1.9 \times 10^{-4}$  | -0.049               |
| Prostate Cancer                  | rs16901979 | 23        | A                   | $3 \times 10^{-14}$    | A               | 0.50                 | $5.2 \times 10^{-3}$  | -0.57                |
| Prostate Cancer                  | rs445114   | 23        | T                   | $5 \times 10^{-10}$    | C               | 0.13                 | $1.6 \times 10^{-3}$  | -0.076               |
| Glioma                           | rs891835   | 24        | G                   | $8 \times 10^{-11}$    | G               | 0.039                | $2.1 \times 10^{-5}$  | $5.8 \times 10^{-3}$ |
| Colorectal Cancer                | rs7014346  | 25        | A                   | $9 \times 10^{-26}$    | G               | $7.9 \times 10^{-4}$ | $2.2 \times 10^{-4}$  | 0.028                |
| Prostate Cancer                  | rs6983267  | 26        | G                   | $7 \times 10^{-12}$    | T               | 0.17                 | $8.7 \times 10^{-4}$  | -0.046               |
| Glioma                           | rs55705857 | 27        | A                   | $2.24 \times 10^{-38}$ | A               | $9.5 \times 10^{-4}$ | $1.2 \times 10^{-5}$  | -0.017               |

**Supplementary Table 10: Previously reported 8q24.21 cancer associated SNPs and their LD with rs1948915<sup>6-27</sup>.**

| Cancer               | SNP       | Reference | Previously Reported |                       | Current MM GWAS |                       | LD with rs2811710     |            |
|----------------------|-----------|-----------|---------------------|-----------------------|-----------------|-----------------------|-----------------------|------------|
|                      |           |           | Risk Allele         | <i>P</i> value        | Risk Allele     | <i>P</i> value        | <i>r</i> <sup>2</sup> | <i>D</i> ' |
| Basal cell carcinoma | rs2151280 | 28        | G                   | $3 \times 10^{-10}$   | A               | 0.0127                | $4.14 \times 10^{-4}$ | -0.0280    |
| ALL                  | rs3731249 | 29        | T                   | $9.4 \times 10^{-23}$ | T               | 0.957                 | 0.0385                | 0.920      |
| CLL                  | rs1679013 | 30        | C                   | $1 \times 10^{-8}$    | C               | $6.54 \times 10^{-3}$ | $4.27 \times 10^{-3}$ | 0.0791     |
| Glioma               | rs4977756 | 31        | G                   | $1 \times 10^{-8}$    | A               | 0.368                 | 0.0513                | 0.360      |
| Melanoma             | rs7023329 | 32        | A                   | $7 \times 10^{-9}$    | G               | 0.0822                | $1.06 \times 10^{-4}$ | -0.0131    |
| Glioma               | rs2157719 | 20        | C                   | $5 \times 10^{-16}$   | T               | 0.399                 | 0.0485                | 0.328      |
| Glioma (High Grade)  | rs1412829 | 33        | C                   | $2 \times 10^{-10}$   | C               | 0.285                 | 0.0434                | -0.317     |

**Supplementary Table 11: Previously reported 9p21.3 cancer associated SNPs and their LD with rs2811710<sup>20,28-33</sup>.**

|                   |                | rs34229995 | rs9372120            | rs7781265 | rs1948915 | rs2811710 | rs2790457 | rs7193541 | rs6066835 |
|-------------------|----------------|------------|----------------------|-----------|-----------|-----------|-----------|-----------|-----------|
| UK                | Beta           | 0.44       | 0.64                 | -0.093    | -0.43     | -0.20     | -0.36     | -0.022    | -0.075    |
|                   | <i>P</i> value | 0.67       | 0.076                | 0.84      | 0.19      | 0.56      | 0.31      | 0.94      | 0.88      |
| Sweden/<br>Norway | Beta           | 1.88       | 1.31                 | NA        | 0.33      | -0.054    | 0.60      | -0.30     | 1.82      |
|                   | <i>P</i> value | 0.070      | $9.5 \times 10^{-3}$ | NA        | 0.47      | 0.91      | 0.23      | 0.51      | 0.01      |
| Germany           | Beta           | 0.068      | 0.15                 | -0.41     | 0.34      | 0.40      | 0.24      | 0.22      | 0.14      |
|                   | <i>P</i> value | 0.94       | 0.73                 | 0.43      | 0.35      | 0.32      | 0.57      | 0.56      | 0.82      |
| USA               | Beta           | 0.93       | -1.18                | 0.023     | 0.28      | 0.017     | -0.51     | 0.55      | -0.71     |
|                   | <i>P</i> value | 0.45       | 0.032                | 0.97      | 0.56      | 0.97      | 0.36      | 0.25      | 0.35      |
| Netherlands       | Beta           | -0.96      | -0.11                | -0.12     | -0.046    | -0.45     | -0.33     | -0.47     | -0.21     |
|                   | <i>P</i> value | 0.16       | 0.67                 | 0.95      | 0.84      | 0.049     | 0.16      | 0.025     | 0.57      |

**Supplementary Table 12: Relationship between SNP genotype and age at diagnosis.** Analysis based on Beta values calculated from linear regression on the discovery phase data sets from UK (cases=2282, controls=5197), Sweden/Norway (cases=1714, controls=10391), Germany (cases=1508, controls=2107), USA (cases=780, controls=1857) and Netherlands (cases=555, controls=2669).

|                   |                | rs34229995 | rs9372120 | rs7781265 | rs1948915 | rs2811710 | rs2790457 | rs7193541 | rs6066835            |
|-------------------|----------------|------------|-----------|-----------|-----------|-----------|-----------|-----------|----------------------|
| UK                | Beta           | -0.052     | -0.013    | -0.11     | 0.036     | -0.028    | 0.12      | 0.021     | 0.069                |
|                   | <i>P</i> value | 0.79       | 0.85      | 0.22      | 0.58      | 0.67      | 0.081     | 0.74      | 0.49                 |
| Sweden/<br>Norway | Beta           | 0.26       | -0.020    | NA        | -0.083    | -0.042    | -0.12     | -0.11     | 0.11                 |
|                   | <i>P</i> value | 0.12       | 0.81      | NA        | 0.25      | 0.58      | 0.12      | 0.13      | 0.34                 |
| Germany           | Beta           | -0.078     | -0.11     | 0.021     | 0.049     | -0.028    | -0.06     | -0.012    | -0.24                |
|                   | <i>P</i> value | 0.69       | 0.22      | 0.84      | 0.53      | 0.74      | 0.45      | 0.88      | 0.06                 |
| USA               | Beta           | -0.43      | 0.16      | -0.061    | 0.019     | -0.13     | -0.040    | -0.046    | -0.60                |
|                   | <i>P</i> value | 0.15       | 0.20      | 0.69      | 0.86      | 0.24      | 0.75      | 0.67      | $1.7 \times 10^{-3}$ |
| Netherlands       | Beta           | -0.11      | -0.13     | 0.077     | -0.11     | 0.017     | -0.012    | 0.028     | -0.068               |
|                   | <i>P</i> value | 0.95       | 0.88      | 0.46      | 0.99      | 0.86      | 0.90      | 0.78      | 0.55                 |

**Supplementary Table 13: Relationship between SNP genotype and sex of multiple myeloma cases.** Analysis based on Beta values calculated from logistic regression on the discovery phase data sets from UK (cases=2282, controls=5197), Sweden/Norway (cases=1714, controls=10391), Germany (cases=1508, controls=2107), USA (cases=780, controls=1857) and Netherlands (cases=555, controls=2669).

|               |                  |         | rs34229995 | rs9372120           | rs7781265              | rs1948915 | rs2811710              | rs2790457             | rs7193541              | rs6066835             |
|---------------|------------------|---------|------------|---------------------|------------------------|-----------|------------------------|-----------------------|------------------------|-----------------------|
| Hyperdiploid  | UK<br>(702)      | Beta    | 0.0285     | -0.111              | $-6.14 \times 10^{-3}$ | -0.0441   | 0.0191                 | -0.142                | -0.0374                | 0.369                 |
|               |                  | P value | 0.892      | 0.140               | 0.950                  | 0.522     | 0.783                  | 0.0555                | 0.569                  | $5.74 \times 10^{-4}$ |
|               | Germany<br>(661) | Beta    | -0.152     | -0.0373             | $7.33 \times 10^{-3}$  | 0.0802    | $-1.37 \times 10^{-3}$ | -0.0318               | -0.0804                | 0.0649                |
|               |                  | P value | 0.435      | 0.677               | 0.944                  | 0.303     | 0.987                  | 0.713                 | 0.281                  | 0.600                 |
|               | Meta             | Beta    | -0.0686    | -0.0805             | $1.17 \times 10^{-4}$  | 0.0104    | 0.0105                 | -0.0953               | -0.0562                | 0.239                 |
|               |                  | P value | 0.630      | 0.162               | 0.999                  | 0.840     | 0.843                  | 0.0901                | 0.255                  | $3.20 \times 10^{-3}$ |
| Translocation | UK<br>(571)      | Beta    | 0.0181     | 0.155               | -0.230                 | 0.0758    | 0.116                  | -0.137                | 0.0190                 | -0.0618               |
|               |                  | P value | 0.936      | 0.0517              | 0.0272                 | 0.302     | 0.118                  | 0.0818                | 0.786                  | 0.588                 |
|               | Germany<br>(768) | Beta    | 0.187      | $-8 \times 10^{-4}$ | -0.0232                | -0.0127   | $-6.96 \times 10^{-3}$ | -0.0771               | -0.0657                | -0.151                |
|               |                  | P value | 0.331      | 0.992               | 0.824                  | 0.870     | 0.931                  | 0.370                 | 0.375                  | 0.219                 |
|               | Meta             | Beta    | 0.116      | 0.0857              | -0.127                 | 0.0338    | 0.0596                 | -0.110                | -0.0210                | -0.103                |
|               |                  | P value | 0.429      | 0.150               | 0.0854                 | 0.526     | 0.274                  | 0.0589                | 0.680                  | 0.217                 |
| t(11;14)      | UK<br>(231)      | Beta    | 0.0335     | 0.186               | -0.380                 | 0.0845    | 0.119                  | -0.322                | 0.0191                 | 0.171                 |
|               |                  | P value | 0.918      | 0.104               | 0.0110                 | 0.423     | 0.261                  | $4.37 \times 10^{-3}$ | 0.850                  | 0.296                 |
|               | Germany<br>(277) | Beta    | -0.232     | 0.0900              | -0.0818                | -0.195    | -0.0151                | 0.0881                | -0.0224                | -0.130                |
|               |                  | P value | 0.350      | 0.434               | 0.543                  | 0.0510    | 0.885                  | 0.427                 | 0.815                  | 0.409                 |
|               | Meta             | Beta    | -0.134     | 0.138               | -0.215                 | -0.0628   | 0.0509                 | -0.113                | $-2.69 \times 10^{-3}$ | 0.0151                |
|               |                  | P value | 0.497      | 0.0886              | 0.0311                 | 0.387     | 0.494                  | 0.153                 | 0.969                  | 0.894                 |
| t(4;14)       | UK<br>(170)      | Beta    | -0.392     | 0.0396              | -0.0224                | 0.154     | 0.0172                 | 0.176                 | 0.0733                 | -0.351                |
|               |                  | P value | 0.292      | 0.764               | 0.897                  | 0.204     | 0.887                  | 0.177                 | 0.526                  | 0.0622                |
|               | Germany<br>(142) | Beta    | 0.521      | -0.110              | 0.206                  | 0.0281    | -0.170                 | -0.122                | -0.135                 | -0.129                |
|               |                  | P value | 0.112      | 0.472               | 0.245                  | 0.831     | 0.219                  | 0.407                 | 0.289                  | 0.541                 |
|               | Meta             | Beta    | 0.121      | -0.0243             | 0.0887                 | 0.0963    | -0.0644                | 0.0451                | -0.0210                | -0.252                |
|               |                  | P value | 0.622      | 0.808               | 0.474                  | 0.281     | 0.480                  | 0.644                 | 0.806                  | 0.0724                |
| t(14;16)      | UK<br>(24)       | Beta    | 1.67       | 0.309               | -0.210                 | -0.139    | -0.189                 | -0.342                | 0.0767                 | -0.896                |
|               |                  | P value | 0.0778     | 0.361               | 0.635                  | 0.657     | 0.541                  | 0.305                 | 0.798                  | 0.0637                |
|               | Germany<br>(29)  | Beta    | 0.384      | -0.182              | 0.205                  | 0.0490    | 0.235                  | -0.283                | 0.0260                 | -0.487                |
|               |                  | P value | 0.586      | 0.587               | 0.595                  | 0.863     | 0.420                  | 0.367                 | 0.923                  | 0.284                 |
|               | Meta             | Beta    | 0.843      | 0.0659              | 0.0263                 | -0.0362   | -0.0356                | 0.311                 | -0.0486                | -0.680                |
|               |                  | P value | 0.136      | 0.784               | 0.928                  | 0.863     | 0.867                  | 0.174                 | 0.809                  | 0.0403                |

**Supplementary Table 14: Relationship between SNP genotype and multiple myeloma subtype.** Case-only analysis; Beta values obtained from logistic regression. FISH and ploidy classification of UK and German samples were determined as previously described<sup>34-36</sup>. Number of samples in each cohort indicated in brackets.

| SNP                    |                       | rs34229995    | rs9372120   | rs7781265      | rs1948915    | rs2811710     | rs2790457   | rs7193541    | rs6066835    |
|------------------------|-----------------------|---------------|-------------|----------------|--------------|---------------|-------------|--------------|--------------|
| Locus                  |                       | 6p22.3        | 6q21        | 7q36.1         | 8q24.21      | 9p21.3        | 10p12.1     | 16q23.1      | 20q13.13     |
| Position (bp, hg19)    |                       | 15,244,018    | 106,667,535 | 150,950,940    | 128,222,421  | 21,991,923    | 28,856,819  | 74,664,743   | 47,355,009   |
| Allele A               |                       | C             | T           | C              | T            | A             | A           | C            | T            |
| Allele B (Risk Allele) |                       | G             | G           | T              | C            | G             | G           | T            | C            |
| Nearest Gene           |                       | <i>JARID2</i> | <i>ATG5</i> | <i>SMARCD3</i> | <i>CCAT1</i> | <i>CDKN2A</i> | <i>WAC</i>  | <i>RFWD3</i> | <i>PREX1</i> |
| UK-MyIX                | HR                    | 1.48          | 0.82        | 0.83           | 0.98         | 1.07          | 0.91        | 0.94         | 0.97         |
|                        | (95%CI)               | (1.03-2.12)   | (0.71-0.95) | (0.68-1.01)    | (0.86-1.13)  | (0.94-1.22)   | (0.79-1.05) | (0.83-1.07)  | (0.79-1.19)  |
|                        | <i>P</i> value        | 0.035         | 0.008       | 0.06           | 0.827        | 0.31          | 0.208       | 0.344        | 0.775        |
| UK-MyXI                | HR                    | 0.81          | 1.19        | 1.12           | 1.05         | 0.91          | 0.92        | 1.05         | 0.88         |
|                        | (95%CI)               | (0.40-1.64)   | (0.96-1.47) | (0.84-1.49)    | (0.85-1.29)  | (0.73-1.13)   | (0.73-1.16) | (0.87-1.29)  | (0.63-1.25)  |
|                        | <i>P</i> value        | 0.555         | 0.117       | 0.423          | 0.679        | 0.409         | 0.484       | 0.61         | 0.484        |
| GER-GMMG               | HR                    | 0.89          | 1.02        | 1.19           | 1.04         | 0.77          | 0.88        | 1.01         | 1.09         |
|                        | (95%CI)               | (0.49-1.63)   | (0.76-1.35) | (0.89-1.60)    | (0.83-1.31)  | (0.59-1.01)   | (0.67-1.17) | (0.78-1.28)  | (0.77-1.54)  |
|                        | <i>P</i> value        | 0.710         | 0.918       | 0.243          | 0.731        | 0.06          | 0.395       | 0.943        | 0.634        |
| US-UAMS                | HR                    | 1.01          | 0.96        | 1.16           | 0.96         | 1.07          | 0.94        | 1.06         | 1.11         |
|                        | (95%CI)               | (0.68-1.51)   | (0.80-1.5)  | (0.93-1.45)    | (0.82-1.12)  | (0.87-1.22)   | (0.78-1.14) | (0.91-1.24)  | (0.87-1.42)  |
|                        | <i>P</i> value        | 0.958         | 0.631       | 0.174          | 0.591        | 0.650         | 0.552       | 0.430        | 0.410        |
| Combined               | HR                    | 1.13 (0.90-   | 0.94 (0.86- | 1.02 (0.91-    | 0.99 (0.91-  | 1.01 (0.92-   | 0.92 (0.83- | 1.00 (0.92-  | 1.01 (0.89-  |
|                        | (95%CI)               | 1.43)         | 1.04)       | 1.15)          | 1.08)        | 1.10)         | 1.01)       | 1.09)        | 1.15)        |
|                        | <i>I</i> <sup>2</sup> | 22            | 64          | 55             | 0            | 50            | 0           | 50           | 0            |
|                        | <i>P</i> value        | 0.295         | 0.206       | 0.698          | 0.894        | 0.85          | 0.084       | 0.845        | 0.866        |

**Supplementary Table 15: Relationship between genome-wide significant SNPs genotype and patient overall survival<sup>37</sup>.** Data from: 1,165 cases from the UK MRC Myeloma-IX trial (UK-MyIX); 877 MM cases from the UK MRC Myeloma-XI trial (UK-MyXI); 511 of the patients recruited to the German-GWAS (GER-GMMG); 703 MM cases in the UAMS Myeloma Institute for Research and Therapy GWAS (US-UAMS). *P* values calculated from Cox regression analysis.

| SNP        | Gene           | Non silent mutations | Silent mutations | Noncoding mutation | <i>P</i> value | <i>q</i> value (FDR) |
|------------|----------------|----------------------|------------------|--------------------|----------------|----------------------|
| rs34229995 | <i>DTNBP1</i>  | 0                    | 1                | 0                  | 0.184          | 1                    |
| rs34229995 | <i>JARID2</i>  | 0                    | 2                | 0                  | 0.910          | 1                    |
| rs9372120  | <i>ATG5</i>    | 0                    | 1                | 0                  | 1              | 1                    |
| rs7781265  | <i>SMARCD3</i> | 0                    | 0                | 0                  | 1              | 1                    |
| rs7781265  | <i>CHPF2</i>   | 0                    | 1                | 0                  | 0.983          | 1                    |
| rs2811710  | <i>CDKN2A</i>  | 0                    | 0                | 0                  | 1              | 1                    |
| rs2790457  | <i>WAC</i>     | 0                    | 1                | 0                  | 0.760          | 1                    |
| rs7193541  | <i>RFWD3</i>   | 0                    | 0                | 0                  | 1              | 1                    |
| rs6066835  | <i>PREX1</i>   | 0                    | 0                | 0                  | 1              | 1                    |

**Supplementary Table 16: Mutation significance analysed with MutSigCV<sup>38</sup> on 463 MM exomes.** The frequency of somatic mutation in genes annotated by GWAS signals was derived from tumor whole exome sequencing of Myeloma XI trial patients.



| SNP       | Locus  | Gene 1        | Gene 2        | Pearson's Correlation<br>(95% CI) | P value               |
|-----------|--------|---------------|---------------|-----------------------------------|-----------------------|
| rs9372120 | 6q21   | <i>ATG5</i>   | <i>PRDM1</i>  | 0.50 (0.29-0.66)                  | $1.99 \times 10^{-5}$ |
| rs2811710 | 9p21.3 | <i>MTAP</i>   | <i>CDKN2A</i> | 0.54 (0.34-0.69)                  | $3.13 \times 10^{-6}$ |
| rs2811710 | 9p21.3 | <i>CDKN2A</i> | <i>CDKN2B</i> | 0.53 (0.33-0.68)                  | $4.99 \times 10^{-6}$ |

**Supplementary Table 17: A pair-wise correlation between gene expression (RNA-seq) within TADs.** Analysis based on RNAseq transcript counts from 66 MM cell lines from the Keat's lab Data Repository<sup>39</sup> (Pearson product-moment correlation coefficient).

| SNP        | Reaction   | Conditions |           | Sequence                                        |
|------------|------------|------------|-----------|-------------------------------------------------|
| rs34229995 | Kaspar     | Std42      | Kaspar A1 | GAAGGTGACCAAGTTCATGCTGCCCATGGATCCTCCC           |
|            |            |            | Kaspar A2 | GAAGGTGGAGTCAACGGATTCTGCCCATGGATCCTCCG          |
|            |            |            | Kaspar C  | CACTTCACAATTGGAAAAATAAATGATCTT                  |
|            | Sanger seq | Std        | Seq F     | ATTCCCAGTATGCCAGTCTT                            |
|            |            |            | Seq R     | AGGCACGTATTGGAAGCTT                             |
| rs9372120  | Kaspar     | Std42      | Kaspar A1 | GAAGGTGACCAAGTTCATGCTCCTCCCTGGGTTACCAAATTCTC    |
|            |            |            | Kaspar A2 | GAAGGTGGAGTCAACGGATTACCTCCTGGGTTACCAAATTCTA     |
|            |            |            | Kaspar C  | ACCATTTTATATCAGACTCTCAAACATCAG                  |
|            | Sanger seq | Std        | Seq F     | TGCACATTAACTCAGCCACA                            |
|            |            |            | Seq R     | GGAAACCGTATTTGAGTAGACCA                         |
| rs7781265  | Kaspar     | Std42      | Kaspar A1 | GAAGGTGACCAAGTTCATGCTCCAATTCAGGGTCCCTGGAT       |
|            |            |            | Kaspar A2 | GAAGGTGGAGTCAACGGATTCCAATTCAGGGTCCCTGGAC        |
|            |            |            | Kaspar C  | CCCACCTTCCAGGGTGTGGCT                           |
|            | Sanger seq | Std        | Seq F     | CCCATTAATGAGGTGGTCGC                            |
|            |            |            | Seq R     | CGATCCCCTTGTGTTTGCC                             |
| rs1948915  | Kaspar     | Std42plus5 | Kaspar A1 | GAAGGTGACCAAGTTCATGCTAGAGTTTTGTTTCCTCCACAGATAT  |
|            |            |            | Kaspar A2 | GAAGGTGGAGTCAACGGATTGAGTTTTGTTTCCTCCACAGATAC    |
|            |            |            | Kaspar C  | ATGCCTTGAATGTGCACCATTCTATGTA                    |
|            | Sanger seq | Std        | Seq F     | CTCACGCAGATCACATGACC                            |
|            |            |            | Seq R     | GTGGGCGTCTCACATTTTG                             |
| rs2811710  | Kaspar     | Std42      | Kaspar A1 | GAAGGTGACCAAGTTCATGCTTATAGCTACTTCAGAAGGCTCAGG   |
|            |            |            | Kaspar A2 | GAAGGTGGAGTCAACGGATTTATAGCTACTTCAGAAGGCTCAGA    |
|            |            |            | Kaspar C  | CTTACCTTGAGAGGACTCTGTGCTA                       |
|            | Sanger seq | Std        | Seq F     | AGTCTTGATTTCTGAAAAGGCTA                         |
|            |            |            | Seq R     | TTGTTACTTCTACCTTGGTGCA                          |
| rs2790457  | Kaspar     | Std42      | Kaspar A1 | GAAGGTGACCAAGTTCATGCTGTGGTGGTACCTGCCTTAGTT      |
|            |            |            | Kaspar A2 | GAAGGTGGAGTCAACGGATTGTGGTGGTACCTGCCTTAGTC       |
|            |            |            | Kaspar C  | CCTTGACCTCCTCAGCTTAAGTGAT                       |
|            | Sanger seq | Std        | Seq F     | TGCATTTCAGTGTGGGCTTT                            |
|            |            |            | Seq R     | AGTCATAACTCAACAAACCGTC                          |
| rs7193541  | Kaspar     | Std42      | Kaspar A1 | GAAGGTGACCAAGTTCATGCTGGACTGGCCAATGGTTCAAG       |
|            |            |            | Kaspar A2 | GAAGGTGGAGTCAACGGATTGCTGGACTGGCCAATGGTTCAA      |
|            |            |            | Kaspar C  | GACTGCTCGTGTTCGCACGTCAT                         |
| rs6066835  | Kaspar     | Std42plus5 | Kaspar A1 | GAAGGTGACCAAGTTCATGCTGTGCCAGTTCAATCACGCCC       |
|            |            |            | Kaspar A2 | GAAGGTGGAGTCAACGGATTGTGCCAGTTCAATCACGCCT        |
|            |            |            | Kaspar C  | TGCAGGGTCTCAGGCCTGAGAT                          |
|            | Sanger seq | Std        | Seq F     | CTGGTGAGGAGGATTCTGGG                            |
|            |            |            | Seq R     | GGAACACTTGGACTCTGAGC                            |
| rs78311596 | Kaspar     | Std42      | Kaspar A1 | GAAGGTGACCAAGTTCATGCTGGAGATGGTCTATGCTTTTAGGAT   |
|            |            |            | Kaspar A2 | GAAGGTGGAGTCAACGGATTGGAGATGGTCTATGCTTTTAGGAA    |
|            |            |            | Kaspar C  | TAAGGTCACATGGTACGGGA                            |
|            | Sanger seq | Std        | Seq F     | CGCTGTGCTCCAACATTCAT                            |
|            |            |            | Seq R     | CTGCAGCATTCCAGAGGCT                             |
| rs72665486 | Kaspar     | 3stepStd42 | Kaspar A1 | GAAGGTGACCAAGTTCATGCTTTCCAGTTGAGCTTCGGATAAGAC   |
|            |            |            | Kaspar A2 | GAAGGTGGAGTCAACGGATTTTCCAGTTGAGCTTCGGATAAGAA    |
|            |            |            | Kaspar C  | CACAAGACTGAGATCAAGGTAATCTTCAA                   |
|            | Sanger seq | Std        | Seq F     | CACAGTTTGTGGGTTAGGA                             |
|            |            |            | Seq R     | TTGAAGACCTAACGGCCCTA                            |
| rs1034447  | Kaspar     | Std42      | Kaspar A1 | GAAGGTGACCAAGTTCATGCTAGGAAAACCTCCATGATGCAGTG    |
|            |            |            | Kaspar A2 | GAAGGTGGAGTCAACGGATTACAGGAAAACCTCCATGATGCAGTA   |
|            |            |            | Kaspar C  | GTCTGCACACATCTCCATGTGTATG                       |
|            | Sanger seq | Std        | Seq F     | AGTGCCTAAATACATACCACCTT                         |
|            |            |            | Seq R     | TCAAGGACAAATGTTCCAGGT                           |
| rs17507636 | Kaspar     | Std42      | Kaspar A1 | GAAGGTGACCAAGTTCATGCTGTATAGGGTAGAATCTAATGCTCTGG |
|            |            |            | Kaspar A2 | GAAGGTGGAGTCAACGGATTGTATAGGGTAGAATCTAATGCTCTGA  |
|            |            |            | Kaspar C  | AGAAGTCTTTCACTGTAGCCATCTGTAT                    |
| rs28571765 | Kaspar     | Std42      | Kaspar A1 | GAAGGTGACCAAGTTCATGCTCCTGTAATCCAGCACTTTGAGG     |
|            |            |            | Kaspar A2 | GAAGGTGGAGTCAACGGATTACCTGTAATCCAGCACTTTGAGA     |

|            |            |            |           |                                                       |
|------------|------------|------------|-----------|-------------------------------------------------------|
|            |            |            | Kaspar C  | TCTCAAACCTCTGGGCTCAAGCAAT                             |
|            | Sanger seq | Std        | Seq F     | TCTTACTTCCATCACCCATGT                                 |
|            |            |            | Seq R     | AGCTATACTATGAATCAAAGCA                                |
| rs76601148 | Kaspar     | Std42      | Kaspar A1 | GAAGGTGACCAAGTTCATGCTACAAAATGGGATATCCAATGATTACTACTA   |
|            |            |            | Kaspar A2 | GAAGGTCTGGAGTCAACGGATTCAAATGGGATATCCAATGATTACTACTG    |
|            |            |            | Kaspar C  | CCTGGATAAGATAATCACCGTGTTTCATT                         |
|            | Sanger seq | Std        | Seq F     | TGTAGCGACTGGAAAATGGC                                  |
|            |            |            | Seq R     | CCTGGATAAGATAATCACCGTGT                               |
| rs8058578  | Kaspar     | Std42      | Kaspar A1 | GAAGGTGACCAAGTTCATGCTTCAACTTCATATTGTTGGTGTTTTCTC      |
|            |            |            | Kaspar A2 | GAAGGTCTGGAGTCAACGGATTCTTCAACTTCATATTGTTGGTGTTTTCTT   |
|            |            |            | Kaspar C  | GGGCGAAAAAGGAAGAGCCAAAGA                              |
| rs6071887  | Kaspar     | Std42plus5 | Kaspar A1 | GAAGGTGACCAAGTTCATGCTGAACAGAAGAAATAATAAATAGCTGATTGAGT |
|            |            |            | Kaspar A2 | GAAGGTCTGGAGTCAACGGATTACAGAAGAAATAATAAATAGCTGATTGAGC  |
|            |            |            | Kaspar C  | CGAGATTCTTGAAGAAGGTTGATTACAT                          |
|            | Sanger seq | Std        | Seq F     | CCAACCAGCAGAGTTTAGACG                                 |
|            |            |            | Seq R     | ATGGAGTTCAGCTTGTGGGT                                  |

### **KASPAR conditions**

#### **Std42**

- Hot Start: 94°C for 15 minutes
- Stage 1: 20 cycles
  - o 94°C for 10 seconds
  - o 57°C for 5 seconds
  - o 72°C for 10 seconds
- Stage 2: 22 cycles
  - o 94°C for 10 seconds
  - o 57°C for 20 seconds
  - o 72°C for 40 seconds

#### **Std42plus5**

- Hot Start: 94°C for 15 minutes
- Stage 1: 20 cycles
  - o 94°C for 10 seconds
  - o 57°C for 5 seconds
  - o 72°C for 10 seconds
- Stage 2: 22 cycles
  - o 94°C for 10 seconds
  - o 57°C for 20 seconds
  - o 72°C for 40 seconds
- Stage 3: 5 cycles
  - o 94°C for 10 seconds
  - o 57°C for 1 minute

#### **3StepStd42**

- Hot Start: 94°C for 15 minutes
- Stage 1: 42 cycles
  - o 94°C for 10 seconds
  - o 57°C for 20 seconds
  - o 72°C for 40 seconds

### **Sequencing conditions**

#### **Std**

- 95°C for 5 minutes
- 25 cycles
  - o 96°C for 30 seconds
  - o 50°C for 15 seconds
  - o 60°C for 1 minute

**Supplementary Table 18: Primers and probes and reaction conditions used for this study.**

## SUPPLEMENTARY REFERENCES

1. Rao, S.S. *et al.* A 3D map of the human genome at kilobase resolution reveals principles of chromatin looping. *Cell* **159**, 1665-80 (2014).
2. Swaminathan, B. *et al.* Variants in ELL2 influencing immunoglobulin levels associate with multiple myeloma. *Nat Commun* **6**, 7213 (2015).
3. Broderick, P. *et al.* Common variation at 3p22.1 and 7p15.3 influences multiple myeloma risk. *Nat Genet* **44**, 58-61 (2012).
4. Chubb, D. *et al.* Common variation at 3q26.2, 6p21.33, 17p11.2 and 22q13.1 influences multiple myeloma risk. *Nat Genet* **45**, 1221-5 (2013).
5. Swaminathan, B. *et al.* Variants in ELL2 influencing immunoglobulin levels associate with multiple myeloma. *Nat Commun* **6**, 7213 (2015).
6. Cozen, W., *et al.* "A meta-analysis of Hodgkin lymphoma reveals 19p13. 3 TCF3 as a novel susceptibility locus." *Nature Commun* **5**, 3856 (2014).
7. Zhang, Ben, *et al.* "Large-scale genetic study in East Asians identifies six new loci associated with colorectal cancer risk." *Nature genetics* **46**, 533-542 (2014).
8. Knipe, Duleeka W., *et al.* "Genetic Variation in Prostate-Specific Antigen-Detected Prostate Cancer and the Effect of Control Selection on Genetic Association Studies." *Cancer Epidemiology Biomarkers & Prevention* **23**, 1356-1365 (2014).
9. Lange, Ethan M., *et al.* "Genome-wide association scan for variants associated with early-onset prostate cancer." *PloS one* **9**, e93436 (2014).
10. Whiffin, Nicola, *et al.* "Identification of susceptibility loci for colorectal cancer in a genome-wide meta-analysis." *Human molecular genetics* **23**, 4729-4737 (2014).
11. Ahsan, Habibul, *et al.* "A Genome-wide association study of early-onset breast cancer identifies PFKM as a novel breast cancer gene and supports a common genetic spectrum for breast cancer at any age." *Cancer Epidemiology Biomarkers & Prevention* **23**, 658-669 (2014).
12. Gudmundsson, Julius, *et al.* "A common variant at 8q24. 21 is associated with renal cell cancer." *Nature communications* **4**, 2776 (2013).
13. Figueroa, Jonine D., *et al.* "Genome-wide association study identifies multiple loci associated with bladder cancer risk." *Human molecular genetics* **23**, 1387-1398 (2014).
14. Berndt, Sonja I., *et al.* "Genome-wide association study identifies multiple risk loci for chronic lymphocytic leukemia." *Nature genetics* **45**, 868-876 (2013).
15. Michailidou, Kyriaki, *et al.* "Large-scale genotyping identifies 41 new loci associated with breast cancer risk." *Nature genetics* **45**, 353-361 (2013).
16. Pharoah, Paul DP, *et al.* "GWAS meta-analysis and replication identifies three new susceptibility loci for ovarian cancer." *Nature genetics* **45**, 362-370 (2013).
17. Xu, Jianfeng, *et al.* "Genome-wide association study in Chinese men identifies two new prostate cancer risk loci at 9q31. 2 and 19q13. 4." *Nature genetics* **44**, 1231-1235 (2012).
18. Cheng, Iona, *et al.* "Evaluating genetic risk for prostate cancer among Japanese and Latinos." *Cancer Epidemiology Biomarkers & Prevention* **21**, 2048-2058 (2012).
19. Schumacher, Fredrick R., *et al.* "Genome-wide association study identifies new prostate cancer susceptibility loci." *Human molecular genetics* **20**, 3867-3875 (2011).
20. Sanson, Marc, *et al.* "Chromosome 7p11. 2 (EGFR) variation influences glioma risk." *Human molecular genetics* **20**, 2897-904 (2011).
21. Fletcher, Olivia, *et al.* "Novel breast cancer susceptibility locus at 9q31. 2: results of a genome-wide association study." *Journal of the National Cancer Institute* **103**, 425-35 (2011).
22. Takata, Ryo, *et al.* "Genome-wide association study identifies five new susceptibility loci for prostate cancer in the Japanese population." *Nature genetics* **42**, 751-754 (2010).
23. Gudmundsson, Julius, *et al.* "Genome-wide association and replication studies identify four variants associated with prostate cancer susceptibility." *Nature genetics* **41**, 1122-1126 (2009).

24. Shete, Sanjay, *et al.* "Genome-wide association study identifies five susceptibility loci for glioma." *Nature genetics* **41**, 899-904 (2009).
25. Tenesa, Albert, *et al.* "Genome-wide association scan identifies a colorectal cancer susceptibility locus on 11q23 and replicates risk loci at 8q24 and 18q21." *Nature genetics* **40**, 631-637 (2008).
26. Eeles, Rosalind A., *et al.* "Multiple newly identified loci associated with prostate cancer susceptibility." *Nature genetics* **40**, 316-321 (2008).
27. Enciso-Mora, Victor, *et al.* "Deciphering the 8q24. 21 association for glioma." *Human molecular genetics* **22**, 2293-302 (2013).
28. Stacey, Simon N., *et al.* "Germline sequence variants in TGM3 and RGS22 confer risk of basal cell carcinoma." *Human molecular genetics* **23**, 3045-53 (2014).
29. Xu, Heng, *et al.* "Inherited coding variants at the CDKN2A locus influence susceptibility to acute lymphoblastic leukaemia in children." *Nature communications* **6**, 7553 (2015).
30. Berndt, Sonja I., *et al.* "Genome-wide association study identifies multiple risk loci for chronic lymphocytic leukemia." *Nature genetics* **45**, 868-876 (2013).
31. Rajaraman, Preetha, *et al.* "Genome-wide association study of glioma and meta-analysis." *Human genetics* **131**, 1877-1888 (2012).
32. Barrett, Jennifer H., *et al.* "Genome-wide association study identifies three new melanoma susceptibility loci." *Nature genetics* **43**, 1108-1113 (2011).
33. Wrensch, Margaret, *et al.* "Variants in the CDKN2B and RTEL1 regions are associated with high-grade glioma susceptibility." *Nature genetics* **41**, 905-908 (2009).
34. Chiecchio, L. *et al.* *Leukemia* **20**, 1610-1617 (2006).
35. Neben, K. *et al.* *Haematologica* **95**, 1150-1157 (2010).
36. Kaiser, M. F., *et al.* *Leukemia* **27**, 1754-1757 (2013).
37. Johnson, David C., *et al.* "Genome-wide association study identifies variation at 6q25. 1 associated with survival in multiple myeloma." *Nature communications* **7**, 10290 (2016).
38. Lawrence, Michael S., *et al.* "Mutational heterogeneity in cancer and the search for new cancer-associated genes." *Nature* **499**, 214-218 (2013).
39. Keats, Jonathan J., *et al.* Keats Lab, <http://www.keatslab.org/data-repository>.
40. Westra, H.J. *et al.* Systematic identification of trans eQTLs as putative drivers of known disease associations. *Nat Genet* **45**, 1238-43 (2013).
41. Grundberg, E. *et al.* Mapping cis- and trans-regulatory effects across multiple tissues in twins. *Nat Genet* **44**, 1084-9 (2012).
